# Supplementary material for: Unique integrated stress response sensors regulate cancer cell susceptibility when Hsp70 activity is compromised
Source: eLife. 2021 Jun 28;10:e64977. doi: 10.7554/eLife.64977 (PMC8275131; doi:10.7554/eLife.64977)
Supplement: Figure 1—figure supplement 1—source data 1. [file elife-64977-fig1-figsupp1-data1.xlsx]

## Sheet: Figure S1A
Figure S1A. Source data HSPA1A mRNA level quantitations
Cell line	Fold Increase	SEM	N
MCF7	21.28	1.62124	3
MDA MB 231	25.8267	1.33024	3
MDA MB 453	30.2867	0.533458	3
MDA MB 361	38.8433	4.24478	3

## Sheet: Figure S1B
Figure S1B. Source data Hsp70 protein level quantitations
Cell line	Fold Increase	SEM	N
MCF7	1.19333	0.447375	3
MDA MB 231	1.42714	0.217625	7
MDA MB 453	1.02875	0.0893316	8
MDA MB 361	1.78	0.243379	3
