# Supplementary material for: Unique integrated stress response sensors regulate cancer cell susceptibility when Hsp70 activity is compromised
Source: eLife. 2021 Jun 28;10:e64977. doi: 10.7554/eLife.64977 (PMC8275131; doi:10.7554/eLife.64977)
Supplement: Figure 1—source data 1. [file elife-64977-fig1-data1.xlsx]

## Sheet: Figure 1A
Figure 1A. Source data cell viability assay qauntification
Note:	(1) Fold change related to vehicle treated samples
	Cell line	MAL3-101 (µM)	Average(1)	SEM	N
	MDA MB 453	30	59.364	0.99034	4
		20	80.7491	6.36879
		10	94.9006	4.75596
		5	99.0104	1.93555
		2.5	102.947	1.71113
		1.25	105.868	1.95919
		0.625	107.958	3.05263
	MDA MB 231	20	1.9606	0.163896	6
		10	6.05289	1.52548
		5	22.8995	4.3462
		2.5	61.6317	4.50144
		1.25	87.7577	2.39033
		0.625	98.3925	2.5793
		0.3125	98.925	1.55973
	MDA MB 468	20	0.986726	0.261751	5
		10	4.60885	1.65283
		5	20.5884	4.82634
		2.5	59.2049	8.56667
		1.25	95.8074	3.9385
		0.625	95.9454	2.50131
		0.3125	97.2852	3.68353
	HCC1937	20	6.57302	1.40502	4
		10	37.1755	1.72025
		5	64.5215	4.71572
		2.5	83.5478	1.84123
		1.25	92.6474	0.841678
		0.625	97.7132	1.62349
	HCC1419	20	26.0264	1.16087	5
		10	41.4893	4.04363
		5	67.9147	3.76637
		2.5	88.8655	1.496
		1.25	99.4931	1.82337
		0.625	104.091	1.60542
	MCF7	20	3.34324	1.00848	3
		10	20.5712	3.95756
		5	26.4154	1.09487
		2.5	60.4774	0.932832
		1.25	98.9092	3.47854
		0.625	103.194	2.49609
	T47D	20	8.12376	2.31619	3
		10	31.5319	9.33387
		5	58.3822	9.8214
		2.5	97.049	1.97232
		1.25	106.973	2.09399
		0.625	113.062	1.76248
	HCC38	30	86.0857	0.547488	3
		20	86.8773	0.349893
		10	92.15	2.29243
		5	92.3868	1.1951
		2.5	97.3314	1.16024
		1.25	100.135	1.6675
		0.625	101.861	0.834294
	MDA MB 361	30	82.6848	3.08258	3
		20	84.5721	2.42868
		10	85.6505	0.356641
		5	88.4065	0.692594
		2.5	88.7816	2.04436
		1.25	96.8381	3.04532
		0.625	98.3168	3.02542
	SKBR3	10	10.3575	0.477993	4
		5	48.5424	8.14809
		2.5	76.4303	3.41642
		1.25	100.18	0.962803
		0.625	104.494	1.90745
	HCC1395	20	19.5605	0.945043	3
		10	58.4122	3.87209
		5	85.4963	2.63475
		2.5	93.41	5.82525
		1.25	98.4825	2.39983
		0.625	99.3619	2.62292
		0.3125	100.435	0.892512
	BT-474	20	2.43737	0.451166	3
		10	10.2939	0.690923
		5	29.3895	5.08105
		2.5	71.0365	3.40567
		1.25	95.7631	1.64526
		0.625	98.584	1.55294
	MDA MB 134	5	3.06183	1.47512	3
		2.5	26.6907	4.69138
		1.25	85.451	5.48682
		0.625	102.583	2.82342
		0.3125	107.151	1.95912
	SUM44PE	20	38.735	3.45164	3
		10	64.9844	2.98936
		5	88.0082	3.81048
		2.5	94.1624	2.61555
		1.25	102.701	4.66518
		0.625	100.937	6.75697

## Sheet: Figure 1C
	Figure 1C. Source data apoptotic marker level quantitations
	Notes:	(1) Fold increase related to 0 Time point
		(2) Statistical significance in comparison to MDA MB 231 cell line (GraphPad Prism software)
		(3) Statistical significance in comparison to MCF7 cell line (GraphPad Prism software)
		* p≤0.05; **p≤0.005 - ns: not significant
	Cleaved Caspase 3
	Cell line	Time point (h)	Average(1)	SEM	N	Significance(2)
	MDA MB 453	3	1.79	0.676782	3	*
		6	2.24	0.465865	5	*
	MDA MB 231	3	10.7217	5.27834	6
		6	23.5627	7.64653	11
	MDA MB 361	3	0.64	0.1	3	*
		6	1.1225	0.32963	4	*
	Cleaved Caspase 8
	Cell line	Time point (h)	Average(1)	SEM	N	Significance(2)
	MDA MB 453	3	2.046	0.486535	5	*
		6	2.71333	0.691536	9	**
	MDA MB 231	3	16.9688	5.1502	8
		6	32.0789	8.58769	9
	MDA MB 361	3	4.45667	2.28434	3	ns
		6	3.36667	0.952109	6	**
	Cleaved Caspase 7
	Cell line	Time point (h)	Average(1)	SEM	N	Significance(2)	Significance(3)
	MDA MB 453	3	3.00333	0.848338	3	*	ns
		6	1.836	0.386039	5	**	*
	MDA MB 231	3	31.9933	9.93868	3		*
		6	41.938	7.91745	5		ns
	MDA MB 361	3	4.40333	2.5888	3	**	ns
		6	3.978	1.91089	5	**	*
	MCF7	3	6.1575	3.06335	4	*
		6	27.124	10.6122	5	ns
