# Supplementary material for: Unique integrated stress response sensors regulate cancer cell susceptibility when Hsp70 activity is compromised
Source: eLife. 2021 Jun 28;10:e64977. doi: 10.7554/eLife.64977 (PMC8275131; doi:10.7554/eLife.64977)
Supplement: Figure 2—figure supplement 1—source data 1. [file elife-64977-fig2-figsupp1-data1.xlsx]

## Sheet: Figure S2A
Figure S2A. Source data proteasome activity quantitations
Cell line	Treatment	Actvity	SEM	N
MCF7	Untreated	6.97158	0.468228	3
	+MG132	0.566667	0.0589727	3
MDA MB 231	Untreated	7.63667	0.348441	3
	+MG132	0.130876	0.0210443	3
MDA MB 453	Untreated	4.19119	0.846935	3
	+MG132	0.0676667	0.011348	3
MDA MB 361	Untreated	6.00168	0.338281	3
	+MG132	0.4	0.0321455	3

## Sheet: Figure S2B
	Figure S2B. Source data cell viability assay qauntification
	Note:	(1) Fold change related to vehicle treated samples
	Cell line	CB-5083 (µM)	Average(1)	SEM	N
	MDA MB 231	2	0.349432	0.259432	3
		1	6.39139	3.89395
		0.5	59.7711	6.24402
		0.25	88.9785	3.40737
		0.125	99.6795	1.22637
		0.0625	101.172	1.78038
	MDA MB 453	2	1.64659	0.717697	2
		1	54.8879	6.99473
		0.5	90.8684	7.83928
		0.25	105.112	4.88503
		0.125	102.09	0.584845
		0.0625	105.912	0.35154
	MCF7	2	13.0273	0.124612	2
		1	18.5008	2.03644
		0.5	43.7215	0.656028
		0.25	82.1547	6.20476
		0.125	92.7348	6.03411
		0.0625	103.673	5.76903
	MDA MB 361	2	5.41627	1.59684	3
		1	57.4857	2.9286
		0.5	89.3676	0.50584
		0.25	97.8018	1.16029
		0.125	101.021	1.25301
		0.0625	112.197	6.48611

## Sheet: Figure S2C
Figure S2C. Source data cell viability assay qauntification
Note:	(1) Fold change related to vehicle treated samples
Cell line	Bafilomycin (nM)	Average(1)	SEM	N
MDA MB 231	40	19.6673	2.07872	4
	13.3333	21.486	1.37804
	4.44444	28.2095	3.79558
	1.48148	42.9339	10.6345
	0.493827	59.8023	16.4846
	0.164609	84.8299	10.9812
	0.0548697	100.781	0.155212
MDA MB 453	40	18.6532	0.333393	3
	20	21.512	0.606761
	10	22.3061	0.720166
	5	22.6456	1.19312
	2.5	39.0456	9.88555
	1.25	90.8058	1.75928
	0.625	100.901	0.0444372
MCF7	20	3.35714	0.638768	4
	10	4.59993	0.740171
	5	6.64543	0.839993
	2.5	12.4408	3.17729
	1.25	38.5341	5.55264
	0.625	78.3004	2.66954
	0.3125	98.813	1.04268
MDA MB 361	40	20.7081	2.05414	4
	13.3333	22.809	0.85731
	4.44444	27.9434	1.49884
	1.48148	55.835	2.93388
	0.493827	86.5035	4.85769
	0.164609	96.3047	3.14424
	0.0548697	108.993	7.55956

## Sheet: Figure S2D
Figure S2D. Source data LC3BII quantitations
Notes:	(1) Fold chage related to vehicle treated samples
	(2) Statistical significance in comparison to MDA MB 231 cell line (GraphPad Prism software)
	(3) Statistical significance in comparison to MCF7 cell line (GraphPad Prism software)
	* p≤0.05 - ns: not significant
Cell line	Treatment	LC3BII (Fold change)(1)	SEM	N	Significance(2)	Significance(3)
MDA MB 231	CQ	1.83	0.144534	5		ns
	Bafilomycin	1.69333	0.294637	3		ns
MDA MB 453	CQ	3.658	0.54684	5	*	*
	Bafilomycin	5.17667	1.15719	3	*	*
MDA MB 361	CQ	3.224	0.350166	5	*	*
	Bafilomycin	3.0775	0.382151	4	*	*
MCF7	CQ	1.612	0.203012	5	ns
	Bafilomycin	1.59333	0.189766	3	ns

## Sheet: Figure S2E
Figure S2E. Source data LC3BII/I quantitations
Notes:	(1) Fold chage related to vehicle treated samples
	(2) Statistical significance in comparison to MDA MB 231 cell line (GraphPad Prism software)
	(3) Statistical significance in comparison to MCF7 cell line (GraphPad Prism software)
	* p≤0.05; **p≤0.005 - ns: not significant
Cell line	Treatment	LC3BII (Fold change)(1)	SEM	N	Significance(2)	Significance(3)
MDA MB 231	CQ	1.7325	0.326506	4		*
	Bafilomycin	1.64	0.377227	3		ns
MDA MB 453	CQ	4.226	0.544533	5	*	**
	Bafilomycin	4.47667	0.871193	3	*	*
MDA MB 361	CQ	3.074	0.31761	5		*
	Bafilomycin	2.6225	0.21199	4		*
MCF7	CQ	1.66	0.145534	5	ns
	Bafilomycin	1.44333	0.413696	3	ns

## Sheet: Figure S2F
Figure S2F. Source data LC3BII quantitations
Notes:	(1) Fold chage (CQ treated/CQ untreated)
	(2) Statistical significance in comparison to MDA MB 231 cell line (GraphPad Prism software)
	(3) Statistical significance in comparison to MCF7 cell line (GraphPad Prism software)
	(4) Statistical significance between CQ and EBSS+CQ samples for each line (GraphPad Prism software)
	* p≤0.05; **p≤0.005 - ns: not significant
Cell line	Treatment	LC3BII (Fold change)(1)	SEM	N	Significance(2)	Significance(3)	Significance(4)
MDA MB 231	CQ	1.73111	0.189095	9		ns
	EBSS + CQ	2.13333	0.13581	6		*	ns
MDA MB 453	CQ	2.89125	0.393403	8	*	*
	EBSS + CQ	4.87714	0.702816	7	**	*	*
MDA MB 361	CQ	2.354	0.283471	5	*	ns
	EBSS + CQ	3.51333	0.338129	6	**	*	*
MCF7	CQ	1.324	0.19577	5	ns
	EBSS + CQ	1.48833	0.18271	6	*		ns
