# Supplementary material for: Unique integrated stress response sensors regulate cancer cell susceptibility when Hsp70 activity is compromised
Source: eLife. 2021 Jun 28;10:e64977. doi: 10.7554/eLife.64977 (PMC8275131; doi:10.7554/eLife.64977)
Supplement: Figure 2—source data 1. [file elife-64977-fig2-data1.xlsx]

## Sheet: Figure 2A
Figure 2A. Source data protein ubiquitination quantitations
Notes:	(1) Statistical significance in comparison between Bortezomib treated cell lines in comparison to MCF7 cells (GraphPad Prism software)
	(2) Statistical significance in comparison between Bortezomib treated cell lines in comparison to MDA MB 231cells (GraphPad Prism software)
	(3) Statistical significance between DMSO and Bortezomib treated cells (GraphPad Prism software)
	* p≤0.05; **p≤0.005; p≤0.0005 - ns: not significant
Cell line	Treatment	Ubiquitin	SEM	N	Significance(1)	Significance(2)	Significance(3)
MCF7	DMSO	28.47	1.05014	3
	Bortezomib	34.3667	2.22983	3		ns	*
MDA MB 231	DMSO	31.6889	4.20457	9
	Bortezomib	54.4711	4.527	9	ns		**
MDA MB 453	DMSO	47.891	7.02666	10
	Bortezomib	110.419	12.8179	10	*	*	***
MDA MB 361	DMSO	54.2883	10.5438	6
	Bortezomib	103.793	11.8042	6	*	*	**

## Sheet: Figure 2B
Figure 2B. Source data cell viability assay qauntification
Note:	(1) Fold change related to vehicle treated samples
Cell line	Bortezomib (nM)	Average(1)	SEM	N
MDA MB 231	80	1.04254	0.0518352	3
	40	2.55733	0.865365
	20	7.65553	2.27163
	10	27.8509	9.02782
	5	43.1148	9.78626
	4	78.1133	8.49041
	2	91.0348	2.72398
	1	88.7821	6.48925
	0.5	94.0604	3.26424
MDA MB 453	20	13.8974	0.167531	4
	10	31.4809	1.66299
	5	39.8494	2.76837
	4	52.2311	3.66462
	2	82.8162	3.27138
	1	93.9828	3.42199
	0.5	99.0141	1.28571
	0.25	99.318	3.84774
MCF7	160	35.4026	1.75631	4
	80	40.3368	1.33157
	40	49.0325	1.48073
	20	62.0355	2.78998
	10	81.5594	2.37051
	5	96.6802	1.88793
	4	102.396	1.23777
	2	110.167	2.60646
MDA MB 361	80	20.4836	1.4787	3
	40	26.9043	0.699796
	20	37.0876	2.41969
	10	56.9989	4.21956
	5	92.5479	1.34612
	2.5	98.1895	3.04507
	1.25	101.215	0.26756

## Sheet: Figure 2C
Figure 2C. Source data cell viability assay qauntification
Note:	(1) Fold change related to vehicle treated samples
Cell line	CQ (µM)	Average(1)	SEM	N
MDA MB 231	100	12.5889	0.538454	3
	50	42.5934	3.84348
	25	68.3953	4.19576
	12.5	82.1327	5.99776
	6.25	87.234	7.00387
	3.125	91.6292	5.62418
	1.5625	94.2977	0.639799
MDA MB 453	100	3.74197	0.18707	3
	50	15.5628	0.705138
	25	45.0672	6.99997
	12.5	69.9824	2.58943
	6.25	85.4583	1.68405
	3.125	94.309	1.97349
MCF7	100	0.65161	0.81392	4
	50	5.35506	0.633538
	25	18.8358	4.47892
	12.5	41.4143	4.82432
	6.25	67.1169	2.87174
	3.125	88.0761	1.51629
	1.5625	92.0894	0.859209
MDA MB 361	100	0.0680341	0.143488	3
	50	6.09318	0.880238
	25	30.9686	1.56525
	12.5	50.8853	1.29235
	6.25	69.855	2.14627
	3.125	84.5987	4.59339
	1.5625	86.5079	5.90839
