# Supplementary material for: Unique integrated stress response sensors regulate cancer cell susceptibility when Hsp70 activity is compromised
Source: eLife. 2021 Jun 28;10:e64977. doi: 10.7554/eLife.64977 (PMC8275131; doi:10.7554/eLife.64977)
Supplement: Figure 3—figure supplement 1—source data 1. [file elife-64977-fig3-figsupp1-data1.xlsx]

## Sheet: Figure S3A
Figure S3A. Source data cell viability assay qauntification
Notes:	(1) Fold change related to bafilomycin only treated samples
	(2) Statistical significance in comparison to MAL3-101 treated cells (Fig.1A) (GraphPad Prism software)
	* p≤0.05; **p≤0.005 - ns: not significant
Cell line	MAL3-101 + bafilomycin	Average(1)	SEM	N	Significance(2)
MDA MB 453	20	21.4798	0.85688	4	*
	10	25.2263	3.93577		**
	5	26.2887	2.23505		**
	2.5	50.0745	9.78397		*
	1.25	90.617	3.93705		ns
	0.625	99.686	1.99246		ns
MDA MB 231	10	0.90945	0.525071	3	ns
	5	1.66903	0.963616		ns
	2.5	11.908	6.87512		ns
	1.25	8.34504	3.73201		ns
	0.625	10.128	4.52939		ns
	0.3125	9.1044	4.07161		ns
MDA MB 361	30	43.9567	2.97782	3	**
	20	58.4733	1.66759		**
	10	63.7175	1.76219		**
	5	71.435	6.47767		ns
	2.5	75.81	4.5264		ns
	1.25	87.9125	8.42974		ns
	0.625	85.4867	4.17162		ns
MCF7	10	18.71	1.6	2	ns
	5	52.785	6.145		ns
	2.5	88.425	2.275		ns
	1.25	93.96	7.17		ns
	0.625	97.62	7.25		ns

## Sheet: Figure S3B
Figure S3B. Source data cell viability assay qauntification
Notes:	(1) Fold change related to vehicle treated samples
	(2) Statistical significance in comparison to Oligo1 samples (GraphPad Prism software)
	(3) Statistical significance in comparison to Oligo2 samples (GraphPad Prism software)
	* p≤0.05; **p≤0.005;p≤ 0.0005; p≤0.0001 - ns: not significant
		CTRL			Oligo1			Oligo2
Cell line	MAL3-101	Viability (1)	SEM	N	Viability (1)	SEM	N	Viability (1)	SEM	N	Significance(2)	Significance(3)
MDA MB 453	20	99.6717	2.04204	6	29.89	2.34387	3	30.8033	2.26673	3	****	****
	10	104.463	3.09865		60.33	4.10254		45.74	2.67143		***	****
	5	102.693	2.59343		86.04	2.92898		62.5767	0.91663		*	****
	2.5	103.527	1.64945		90.13	2.43439		65.27	3.35652		**	****
	1.25	101.512	3.02682		96.9567	1.4499		71.0467	1.16764		ns	**
	0.625	104.117	2.655		103.26	5.07993		86.5367	3.1828		ns	*
MDA MB 231	10	2.36333	0.624776	3	3.04333	0.181873	3	1.99333	0.720054	3	ns	ns
	5	9.32333	1.05072		9.64667	1.87048		11.9333	2.31706		ns	ns
	2.5	34.1767	2.13292		32.7867	1.23874		42.09	2.93497		ns	ns
	1.25	83.3667	1.84252		85.8567	0.934475		90.4667	7.84837		ns	ns
	0.625	104.157	2.19715		103.8	4.0105		102.583	1.63931		ns	ns
	0.3125	105.41	2.43477		99.9333	0.364707		101.187	2.06131		ns	ns
MDA MB 361	30	86.1033	2.95654	3	27.6833	2.59033	3	32.5333	2.39501	3	**	**
	20	87.9267	1.88952		66.0267	2.2996		61.0867	3.04194		*	*
	10	90.8867	3.73337		81.81	1.55211		75.0533	2.51538		ns	ns
	5	91.41	2.61064		90.9233	1.46044		87.4233	1.46144		ns	ns
	2.5	97.4633	3.83206		93.87	1.785		90.2067	3.23678		ns	ns
	1.25	97.71	1.12398		94.3967	1.73599		92.51	1.37226		ns	ns
MCF7	10	17.48	4.95534	4	5.6	0.646452	3	6.76	1.06715	3	ns	ns
	5	50.01	4.93521		16.1	0.776745		24.44	3.37971		*	ns
	2.5	82.035	4.33734		60.61	5.03808		58.06	4.47186		ns	ns
	1.25	100.2	1.79274		97.0767	5.30635		94.21	5.40963		ns	ns
	0.625	105.728	1.53621		105.103	1.5843		100.697	6.97478		ns	ns
	0.3125	103.017	2.24549		108.83	0.586202		104.19	6.36717		ns	ns
