# Supplementary material for: Unique integrated stress response sensors regulate cancer cell susceptibility when Hsp70 activity is compromised
Source: eLife. 2021 Jun 28;10:e64977. doi: 10.7554/eLife.64977 (PMC8275131; doi:10.7554/eLife.64977)
Supplement: Figure 3—source data 1. [file elife-64977-fig3-data1.xlsx]

## Sheet: Figure 3A
Figure 3A. Source data cell viability assay qauntification
Notes:	(1) Fold change related to CQ only treated samples
	(2) Statistical significance in comparison to MAL3-101 treated cells (Fig.1A) (GraphPad Prism software)
	* p≤0.05; **p≤0.005 - ns: not significant
Cell line	MAL3-101 + CQ	Average(1)	SEM	N	Significance(2)
MDA MB 453	20	28.2667	2.1578	4	**
	10	43.58	4.73292		**
	5	56.01	4.74844		**
	2.5	69.0575	3.49202		**
	1.25	84.7025	5.51746		*
	0.625	97.9975	1.77598		*
MDA MB 231	10	5.065	0.895	2	ns
	5	22.045	1.355		ns
	2.5	63.045	16.795		ns
	1.25	83.435	10.975		ns
	0.625	102.77	1.61		ns
	0.3125	106.295	2.505		ns
MDA MB 361	30	49.915	0.375	2	*
	20	61.26	3.75		*
	10	66.325	1.695		**
	5	69.67	0.13		**
	2.5	78.035	5.705		ns
	1.25	83.56	5.41		ns
	0.625	96.02	3.98		ns
MCF7	10	2.3	0.14	4	ns
	5	22.49	2.19		**
	2.5	86.09	1.98		*
	1.25	102.735	5.595		ns
	0.625	109.85	4.36		ns

## Sheet: Figure 3B
	Figure 3B. Source data cell viability assay qauntification
	Notes:	(1) Fold change related to Bortezomib only treated samples
		(2) Statistical significance in comparison to MAL3-101 treated cells (Fig.1A) (GraphPad Prism software)
		* p≤0.05 - ns: not significant
	Cell line	MAL3-101 + Bortezomib	Average(1)	SEM	N	Significance(2)
	MDA MB 453	20	60.0725	2.90364	4	ns
		10	65.3175	2.67536		*
		5	75.24	3.42097		*
		2.5	93.98	2.79531		ns
		1.25	97.8675	1.81616		ns
		0.625	103.19	2.52437		ns
	MDA MB 231	10	-0.0766667	1.10505	3	ns
		5	6.06667	2.10367		ns
		2.5	24.4667	3.7006		*
		1.25	59.8533	8.39585		*
		0.625	92.1633	6.56197		ns
		0.3125	100.3	3.9616		ns
	MDA MB 361	20	81.015	0.965	2	ns
		10	87.155	1.815		ns
		5	95.04	1.81		ns
		2.5	99.765	0.225		ns
		1.25	99.86	0.14		ns
		0.625	103.885	2.855		ns
	MCF7	10	15.64	1.92	2	ns
		5	38.97	8.93		ns
		2.5	80.225	5.165		ns
		1.25	97.645	1.895		ns
		0.625	99.57	1.43		ns
