# Supplementary material for: Unique integrated stress response sensors regulate cancer cell susceptibility when Hsp70 activity is compromised
Source: eLife. 2021 Jun 28;10:e64977. doi: 10.7554/eLife.64977 (PMC8275131; doi:10.7554/eLife.64977)
Supplement: Figure 4—source data 1. [file elife-64977-fig4-data1.xlsx]

## Sheet: Figure 4A
Figure 4A. Source data autophagy related gene level quantitations
Notes:	(1) Statistical significance in comparison to MAL3-101 sensitive cell values (GraphPad Prism software)
	* p≤0.05; **p≤0.005 - ns: not significant
Cell line	ATG3 (Fold Increase)	SEM	N	Significance(1)	ATG5 (Fold Increase)	SEM	N	Significance(1)	ATG12 (Fold Increase)	SEM	N	Significance(1)	MAP1LC3B (Fold Increase)	SEM	N	Significance(1)
MCF7	0.71	0.0665833	3		0.946667	0.253333	3		1.13667	0.131698	3		1.26333	0.472241	3
MDA MB 231	1.27667	0.112891	3		0.923333	0.101708	3		2.045	0.125	2		1.6	0.202978	3
MDA MB 453	4.81333	0.559325	3	*	3.48	0.787655	4	*	7.97667	1.05367	3	*	6.0075	0.737715	4	**
MDA MB 361	7.32667	0.804991	3	*	8.5225	1.19577	4	**	13.92	2.39167	4	*	20.775	2.27107	4	**

## Sheet: Figure 4B
Figure 4B. Source data autophagy related gene level quantitations (time course)
Notes:	(1) Statistical significance between 3 and 6 h time points in each cell line (GraphPad Prism software)
	* p≤0.05; **p≤0.005 - ns: not significant
	Time points in presence of MAL3-101	MCF7				MDA MB 231				MDA MB 453				MDA MB 361
		ATG3 (Fold Increase)	SEM	N	Significance(1)	ATG3 (Fold Increase)	SEM	N	Significance(1)	ATG3 (Fold Increase)	SEM	N	Significance(1)	ATG3 (Fold Increase)	SEM	N	Significance(1)
	3	0.593333	0.0581187	3		1.38	0.1	2		1.54049	0.324416	4		3.7325	0.820512	4
	6	0.966667	0.260278	3	ns	1.445	0.115	2	ns	3.8935	0.739718	4	*	7.32667	0.804991	3	*
	Time points in presence of MAL3-101	MCF7				MDA MB 231				MDA MB 453				MDA MB 361
		ATG5 (Fold Increase)	SEM	N		ATG5 (Fold Increase)	SEM	N		ATG5 (Fold Increase)	SEM	N		ATG5 (Fold Increase)	SEM	N	Significance(1)
	3	0.793333	0.315242	3		0.756667	0.0392994	3		1.06	0.0470815	4		3.81167	1.11007	3
	6	0.946667	0.253333	3	ns	0.923333	0.101708	3	ns	3.525	0.768521	4	*	8.5225	1.19577	4	*
	Time points in presence of MAL3-101	MCF7				MDA MB 231				MDA MB 453				MDA MB 361
		ATG12 (Fold Increase)	SEM	N		ATG12 (Fold Increase)	SEM	N		ATG12 (Fold Increase)	SEM	N		ATG12 (Fold Increase)	SEM	N	Significance(1)
	3	0.9	0.173205	3		1.44	0.13	2		2.09333	0.265916	3		6.5925	0.850268	4
	6	1.13667	0.131698	3	ns	2.045	0.125	2	ns	7.97667	1.05367	3	*	13.92	2.39167	4	*
	Time points in presence of MAL3-101	MCF7				MDA MB 231				MDA MB 453				MDA MB 361
		MAP1LC3B (Fold Increase)	SEM	N		MAP1LC3B (Fold Increase)	SEM	N		MAP1LC3B (Fold Increase)	SEM	N		MAP1LC3B (Fold Increase)	SEM	N	Significance(1)
	3	0.666667	0.24037	3		0.89	0.12	2		1.60333	0.324054	3		12.9525	1.61351	4
	6	1.26333	0.472241	3	ns	1.6	0.202978	3	ns	6.0075	0.737715	4	**	20.775	2.27107	4	*

## Sheet: Figure 4D
Figure 4D. Source data LC3BII and LC3BII/I quantitations
Notes:	(1) Fold chage (CQ treated/ CQ untreated)
	(2) Statistical significance between CQ and MAL3-101+CQ samples (GraphPad Prism software)
	* p≤0.05 - ns: not significant
		MCF7				MDA MB 231				MDA MB 453				MDA MB 361
		LC3BII(1)	SEM	N	Significance(2)	LC3BII(1)	SEM	N	Significance(2)	LC3BII(1)	SEM	N	Significance(2)	LC3BII(1)	SEM	N	Significance(2)
	CQ	1.73111	0.189095	9		1.324	0.19577	5		2.89125	0.393403	8		2.354	0.283471	5
	MAL3-101 + CQ	1.39222	0.151829	9	ns	1.644	0.306897	5	ns	4.56143	0.55823	7	*	3.892	0.484751	5	*
		LC3BII/I(1)	SEM	N	Significance(2)	LC3BII/I(1)	SEM	N	Significance(2)	LC3BII/I(1)	SEM	N	Significance(2)	LC3BII/I(1)	SEM	N	Significance(2)
	CQ	1.83571	0.183962	7		2.37667	0.338936	3		4.546	0.940386	5		2.235	0.671346	6
	MAL3-101 + CQ	2.13571	0.624621	7	ns	2.5725	0.393941	4	ns	10.456	2.31568	5	*	4.63	0.492125	6	*
