# Supplementary material for: Unique integrated stress response sensors regulate cancer cell susceptibility when Hsp70 activity is compromised
Source: eLife. 2021 Jun 28;10:e64977. doi: 10.7554/eLife.64977 (PMC8275131; doi:10.7554/eLife.64977)
Supplement: Figure 5—source data 1. [file elife-64977-fig5-data1.xlsx]

## Sheet: Figure 5C
Source data of RFP+ GFP-/RFP+ GFP+ (%)
	MDA MB 453			MDAMB 231
	DMSO	MAL3-101	EBSS	DMSO	MAL3-101	EBSS			non-parametric Kruskal-Wallis test analysis	Mean rank diff.	Significance
	0	20	43	7	0	0
	7	17	0	8	0	23		MDA MB 453	DMSO vs. MAL3-101	-121.9	****
	0	14	50	0	0	0			DMSO vs. EBSS	-74.81	*
	7	7	40	8	0	7			MAL3-101 vs. EBSS	47.1	ns
	0	17	45	4	0	30		MDA MB 231	DMSO vs. MAL3-101	24.27	ns
	20	25	62	25	0	8			DMSO vs. EBSS	-84.59	**
	0	11	63	29	0	6			MAL3-101 vs. EBSS	-108.9	****
	0	0	40	36	0	14
	0	15	0	17	0	0
	0	23	67	40	0	25			Note:	* p≤0.05; **p≤0.005; **** p≤0.0001 - ns: not significant
	14	0	14	22	0	20
	5	0	8	40	0	0
	7	0	0	0	0	5
	17	0	0	0	0	0
	0	42	0	0	19	6
	0	50	0	0	0	0
	0	14	22	0	0	0
	0	8	0	0	0	0
	0	33	6	0	0	15
	0	3	0	0	5	17
	0	13	8	0	10	33
	33	17	0	33	0	17
	0	9	3	0	7	6
	0	9	0	0	0	7
	0	5	7	0	12	0
	6	7	0	0	0	0
	0	6	7	20	0	11
	13	20	0	0	0	19
	0	0	13	0	0	9
	0	12	0	10	0	17
	17	0	5	0	0	5
	9	29	0	14	0	0
	0	13	12	22	17	6
	11	18	7	33	7	10
	7	33	80	25	0	0
	6	67	30	0	0	14
	0	54	38	0	17	50
	33	30	28	0	0	0
	0	29	20	0	0	5
	0	22	6	0	7	0
	0	20	7	0	5	5
	0	45	0	0	0	0
	0	50	0	33	0	10
	0	50	0	6	0	0
	17	31	0	0	0	17
	25	17	29	0	0	0
	7	0	0	0	0	11
	0	0	13	0	0	0
	0	20	0	0	0	0
	0	12	16	0	0	0
	50	6	13	0	10	0
	9	0	0	0	0	11
	0	9	17	0	0	13
	0	29	0	0	0	21
	25	17	0	17	0	13
	17	0	14	0	0	0
	50	0	25	20	11	9
	0	17	13	12	18	17
	33	20	16	17	0	13
	0	13	0	10	0	17
	0	29	0	5	0	20
	0	40	0	10	0	6
	0	20	25	0	14	15
	0	33	33	17	38	33
	0	5	0	29	33	25
	0	10	0	14	0	38
	0	0	3	14	0	7
	0	7	7	17	0	12
	17	29	8	0	0	21
	5	25	29	0	15	29
	13	14	0	20	0	0
	20	0	25	10	0	13
	9	13	12	0	0	10
	7	20	21	0	0	6
	13	12	26	5	14	6
	17	6	25	14	33	33
	14	22	41	3	21	21
	0	11	4	7	25	12
	0	0	10	5	25	0
	6	12	0	0	33	5
			6	3	0	50
			9	0	12	40
			17	0	15	22
			13	0	12	20
			4	0	29	13
			0			10
			0			18
			14			17
			0			11
			10			31
			20			40
			10			25
			4			33
			10			50
			12			0
			17			33
			7			20
			24			0
			5			0
			14			0
			32			13
			24			80
			50			10
