# Supplementary material for: Unique integrated stress response sensors regulate cancer cell susceptibility when Hsp70 activity is compromised
Source: eLife. 2021 Jun 28;10:e64977. doi: 10.7554/eLife.64977 (PMC8275131; doi:10.7554/eLife.64977)
Supplement: Figure 6—figure supplement 1—source data 1. [file elife-64977-fig6-figsupp1-data1.xlsx]

## Sheet: Figure S4
Source data apoptotic marker level quantitations
Notes:	(1) Fold increase related to DMSO
	(2) Statistical significance in comparison to DMSO (GraphPad Prism software)
	* p≤0.05; **p≤0.005; ***p≤0.0005; ****p≤0.0001 - ns: not significant
Cleaved Caspase 3
Cell line	Treatments	Average(1)	SEM	N	Significance(2)
MDA MB 453	CQ	1.78667	0.543885	3	ns
	MAL3-101	2.3425	0.342072	8	ns
	MAL3-101 + CQ	12.9225	4.1791	4	**
MDA MB 231	CQ	1.57167	0.427133	6	ns
	MAL3-101	22.1337	5.52221	8	***
	MAL3-101 + CQ	17.1333	5.98302	6	**
Cleaved Caspase 7
Cell line	Treatments	Average(1)	SEM	N	Significance(2)
MDA MB 453	CQ	0.963333	0.178916	3	ns
	MAL3-101	2.105	0.364109	4	ns
	MAL3-101 + CQ	21.49	5.04246	3	*
MDA MB 231	CQ	1.5975	0.688057	4	ns
	MAL3-101	35.015	3.30295	4	**
	MAL3-101 + CQ	27.2575	4.49505	4	*
Cleaved Caspase 8
Cell line	Treatments	Average(1)	SEM	N	Significance(2)
MDA MB 453	CQ	2.29143	0.652838	6	ns
	MAL3-101	2.74667	0.804978	9	*
	MAL3-101 + CQ	16.005	2.92841	8	****
MDA MB 231	CQ	1.49875	0.410955	8	ns
	MAL3-101	32.0592	7.8356	12	****
	MAL3-101 + CQ	38.7457	8.91145	7	****
CHOP
Cell line	Treatments	Average(1)	SEM	N	Significance(2)
MDA MB 453	CQ	1.37667	0.282627	3	ns
	MAL3-101	1.676	0.248226	5	ns
	MAL3-101 + CQ	5.33333	0.521291	3	**
MDA MB 231	CQ	1.65667	0.412647	3	ns
	MAL3-101	8.95125	1.88206	8	***
	MAL3-101 + CQ	8.07	2.56841	4	**
