# Supplementary material for: Unique integrated stress response sensors regulate cancer cell susceptibility when Hsp70 activity is compromised
Source: eLife. 2021 Jun 28;10:e64977. doi: 10.7554/eLife.64977 (PMC8275131; doi:10.7554/eLife.64977)
Supplement: Figure 6—source data 1. [file elife-64977-fig6-data1.xlsx]

## Sheet: Figure 6B
Figure 6B. Source data apoptosis level quantitations
Note:	(1) Statistical significance Holm-Sidak's multiple comparisons test (GraphPad Prism software)
	* p≤0.05;** p≤0.005; **** p≤0.0001- ns: not significant
		MDA MB 231					MCF7					MDA MB 453					MDA MB 361
		Apoptotic cells (%)	SEM	N	Significance(1)		Apoptotic cells (%)	SEM	N	Significance(1)		Apoptotic cells (%)	SEM	N	Significance(1)		Apoptotic cells (%)	SEM	N	Significance(1)
	DMSO	9.9	0.3	2	DMSO vs. MAL3-101	*	8.05	1.15	2	DMSO vs. MAL3-101	*	11.325	0.597739	4	DMSO vs. MAL3-101	ns	8.725	1.57341	4	DMSO vs. MAL3-101	ns
	MAL3-101	37.2	5	2	DMSO vs. CQ	ns	36.4	2.9	2	DMSO vs. CQ	ns	14.74	1.15135	5	DMSO vs. CQ	ns	8.72	2.14252	5	DMSO vs. CQ	ns
	CQ	5.4	1.2	2	DMSO vs. MAL3-101 + CQ	*	15.75	4.65	2	DMSO vs. MAL3-101 + CQ	*	16.525	3.73929	4	DMSO vs. MAL3-101 + CQ	****	16.925	1.37014	4	DMSO vs. MAL3-101 + CQ	****
	MAL3-101 + CQ	34.5	2.7	2	MAL3-101 vs. CQ	**	34.75	2.75	2	MAL3-101 vs. CQ	*	40.78	2.13902	5	MAL3-101 vs. CQ	ns	46.44	1.83592	5	MAL3-101 vs. CQ	ns
					MAL3-101 vs. MAL3-101 + CQ	ns				MAL3-101 vs. MAL3-101 + CQ	ns				MAL3-101 vs. MAL3-101 + CQ	****				MAL3-101 vs. MAL3-101 + CQ	****
					CQ vs. MAL3-101 + CQ	*				CQ vs. MAL3-101 + CQ	*				CQ vs. MAL3-101 + CQ	****				CQ vs. MAL3-101 + CQ	****

## Sheet: Figure 6C
Figure 6C. Source data cell viability assay qauntification
Note:	(1) Fold change related to vehicle treated samples
	(2) Statistical significance between MDA MB 231 and MDA MB 453 sensitivity (GraphPad Prism software)
	***p≤0.0005 - ns: not significant
	MDA MB 231			MDA MB 453
Everolimus (µM)	Average(1)	SEM	N	Average(1)	SEM	N	Significance(2)
40	1.25667	0.0578312	3	0.325	0.205	2	ns
20	5.05333	0.424748	3	26.836	1.6003	5	***
10	47.54	1.70571	3	47.826	2.59505	5	ns
1	54.9367	0.986109	3	58.788	1.01053	5	ns
0.501187				66.438	2.0042	5	ns
0.199526	60.8367	2.63001	3	71.2275	1.27493	4	ns
0.001	107.45	7.02	2	85.69	3.76	2	ns
0.0001	106.78	5.76	2	99.735	0.275	2	ns

## Sheet: Figure 6D
Figure 6D. Source data cell viability assay qauntification
Note:	(1) Fold change related to everolimus only treated samples
	(2) Statistical significance in comparison to MAL3-101 treated cells (Fig.6C) (GraphPad Prism software)
	* p≤0.05; **p≤0.005 - ns: not significant
Cell line	MAL3-101 + everolimus	Average(1)	SEM	N	Significance(2)
MDA MB 231	10	12.5	1.19	2	**
	5	53.735	2.605		**
	2.5	100.13	2.54		**
	1.25	102.975	2.135		ns
MDA MB 453	19.9526	65.3915	1.06557	2	ns
	10	79.7124	1.27022		ns
	5.01187	88.3893	2.7361		ns
	2.5	96.0531	0.756875		ns
	1.25	101.624	1.59446		ns
