# Supplementary material for: Unique integrated stress response sensors regulate cancer cell susceptibility when Hsp70 activity is compromised
Source: eLife. 2021 Jun 28;10:e64977. doi: 10.7554/eLife.64977 (PMC8275131; doi:10.7554/eLife.64977)
Supplement: Figure 7—figure supplement 1—source data 1. [file elife-64977-fig7-figsupp1-data1.xlsx]

## Sheet: Figure S5A
Figure S7A. Source data Ire1α protein level quantitations
	MCF7
	IRE1α	SEM	N
	1.69333	0.238071	3
	MDA MB 231
	IRE1α	SEM	N
	0.414286	0.12765	7
	MDA MB 453
	IRE1α	SEM	N
	0.84	0.169115	5
	MDA MB 361
	IRE1α	SEM	N
	0.866667	0.339428	3

## Sheet: Figure S5B
Figure S7B. Source data DDIT3 gene level quantitations (time course)
Notes:	(1) Statistical significance between 3 and 6 h time points in each cell line (GraphPad Prism software)
	* p≤0.05 - ns: not significant
Time point in presence of MAL3-101	MCF7				MDA MB 231				MDA MB 453				MDA MB 361
	Fold change	SEM	N	Significance(1)	Fold change	SEM	N	Significance(1)	Fold change	SEM	N	Significance(1)	Fold change	SEM	N	Significance(1)
3	5.27667	0.778125	3		6.59333	1.5906	3		1.18	0.160416	3		1.47667	0.0584047	3
6	7.91333	0.577389	3	*	11.13	2.54031	4	*	1.9175	0.371671	4	ns	1.81	0.315331	3	ns

## Sheet: Figure S5C
Figure S7C. Source data BBC3 (PUMA) gene level quantitations (time course)
Notes:	(1) Statistical significance between tested lines (GraphPad Prism software)
	* p≤0.05; **p≤0.005; - ns: not significant
	MCF7			MDA MB 231			MDA MB 453			MDA MB 361			Significance(1)
	Fold change	SEM	N	Fold change	SEM	N	Fold change	SEM	N	Fold change	SEM	N	MCF7 vs. MDA MB 231	ns
	7.27667	0.360201	3	10.2467	2.70457	3	1.13333	0.202759	3	1.24667	0.0731057	3	MCF7 vs. MDA MB 453	*
													MCF7 vs. MDA MB 361	*
													MDA MB 231 vs. MDA MB 453	**
													MDA MB 231 vs. MDA MB 361	**
													MDA MB 453 vs. MDA MB 361	ns

## Sheet: Figure S5D
Figure S7D. Source data p-eIF2α level quantitations
Notes:	(1) Statistical significance in comparison to DMSO (GraphPad Prism software)
	(2) Fold change related to DMSO treated samples
	* p≤0.05; **p≤0.005
Cell line	Treatments	Fold change(2)	SEM	N	Significance(1)
MCF7	MAL3-101	3.61778	0.493034	9	**
	DTT	4.76286	0.915906	7	*
	Treatments	Fold change(2)	SEM	N	Significance(1)
MDA MB 231	MAL3-101	2.91091	0.657427	11	*
	DTT	3.14833	0.889342	6	*
	Treatments	Fold change(2)	SEM	N	Significance(1)
MDA MB 453	MAL3-101	2.54067	0.270093	15	**
	DTT	3.068	0.577858	10	**
	Treatments	Fold change(2)	SEM	N	Significance(1)
MDA MB 361	MAL3-101	2.77417	0.392742	12	*
	DTT	3.12857	0.527787	7	*

## Sheet: Figure S5E
Figure S7E. Source data CHOP level quantitations
Notes:	(1) Statistical significance in comparison to DMSO (GraphPad Prism software)
	(2) Fold change related to DMSO treated samples
	* p≤0.05; **p≤0.005 - ns: not significant
		MCF7				MDA MB 231				MDA MB 453				MDA MB 361
	Time point in presence of MAL3-101	Fold change(2)	SEM	N	Significance(1)	Fold change(2)	SEM	N	Significance(1)	Fold change(2)	SEM	N	Significance(1)	Fold change(2)	SEM	N	Significance(1)
	3	1.772	0.70788	5	ns	2.205	0.425901	6	ns	1.13667	0.0876229	3	ns	1.03667	0.182787	3	ns
	6	4.342	0.234231	5	*	9.085	2.13561	4	*	1.67	0.634731	4	ns	1.8325	0.530996	4	ns
	18	8.756	2.4981	5	**	9.035	2.35477	4	*	1.83667	0.526951	3	ns	1.34667	0.326667	3	ns
	DTT	6.275	1.55896	4	*	8.875	1.76481	4	*	8.43667	1.87258	3	**	8.0025	2.0844	4	**
