# Supplementary material for: Unique integrated stress response sensors regulate cancer cell susceptibility when Hsp70 activity is compromised
Source: eLife. 2021 Jun 28;10:e64977. doi: 10.7554/eLife.64977 (PMC8275131; doi:10.7554/eLife.64977)
Supplement: Figure 7—source data 1. [file elife-64977-fig7-data1.xlsx]

## Sheet: Figure 7A
Figure 7A. Source data sXbpI and HSPA5A gene level quantitations
	MCF7			MDA MB 231			MDA MB 453			MDA MB 361
Target	Fold increase	SEM	N	Fold increase	SEM	N	Fold increase	SEM	N	Fold increase	SEM	N
sXbpI	24.3067	2.1867	3	9.1	3.30051	3	3.764	1.28184	5	8.645	2.03793	4
HSPA5A	4.94	0.788691	3	9.14	1.08116	3	4.19667	0.900376	3	3.62	0.249065	3

## Sheet: Figure 7B
Figure 7B. Source data ATF6 protien level quantitations
Notes:	(1) Statistical significance between MAL3-101 and DTT treated samples (GraphPad Prism software)
	(2) Fold change related to DMSO treated samples
	* p≤0.05
		MCF7				MDA MB 231				MDA MB 453				MDA MB 361
	Treatment	Fold change(2)	SEM	N	Significance(1)	Fold change(2)	SEM	N	Significance(1)	Fold change(2)	SEM	N	Significance(1)	Fold change(2)	SEM	N	Significance(1)
	MAL3-101	1.08	0.120968	3		0.886667	0.0202759	3		1.1	0.090185	3		1.17667	0.203661	3
	DTT	0.53	0.115326	3	*	0.296667	0.0817177	3	*	0.666667	0.0375648	3	*	0.396667	0.10105	3	*

## Sheet: Figure 7C
Figure 7C. Source data ATF4 and DDIT3 gene level quantitations
Notes:	(1) Statistical significance in comparison to MDA MB 231 cells (GraphPad Prism software)
	(2) Statistical significance in comparison to MCF7 (GraphPad Prism software)
	* p≤0.05; **p≤0.005; ****p≤0.0001 - ns: not significant
	MCF7			MDA MB 231			MDA MB 453					MDA MB 361
Target	Fold increase	SEM	N	Fold increase	SEM	N	Fold increase	SEM	N	Significance(1)	Significance(2)	Fold increase	SEM	N	Significance(1)	Significance(2)
ATF4	3.055	0.245	2	1.9325	0.152937	4	2.97	0.483787	4	ns	ns	10.16	0.714516	3	****	****
DDIT3	7.91333	0.577389	3	11.13	2.54031	4	1.9175	0.371671	4	**	*	1.77667	0.330774	3	**	*
