# Supplementary material for: Unique integrated stress response sensors regulate cancer cell susceptibility when Hsp70 activity is compromised
Source: eLife. 2021 Jun 28;10:e64977. doi: 10.7554/eLife.64977 (PMC8275131; doi:10.7554/eLife.64977)
Supplement: Figure 8—source data 1. [file elife-64977-fig8-data1.xlsx]

## Sheet: Figure 8B
Figure 8B. Source data Ire1α level quantitations
Notes:	(1) Fold increase related to CTRL
	(2) Statistical significance in comparison to CTRL (GraphPad Prism software)
	* p≤0.05; **p≤0.005; ***p≤0.0005; ****p≤0.0001 - ns: not significant
Cell line	Fold decrease(1)	SEM	N	Significance(2)
MDA MB 231	0.13	0.0295522	6	****
MDA MB 453	0.308571	0.0351479	7	***

## Sheet: Figure 8C
Figure 8C. Source data sXbpI mRNA level quantitations
Notes:	(1) Fold increase related to DMSO CTRL
	(2) Statistical significance between MAL3-101 CTRL and MAL3-101 Ire1αi (GraphPad Prism software)
	(3) Statistical significance in comparison to CTRL (GraphPad Prism software)
	* p≤0.05; **p≤0.005 - ns: not significant
MDA MB 231	Treatments	Fold change (1)	SEM	N	Significance(2)	Significance(3)
CTRL	DMSO	1	0	3	ns
	MAL3-101	9	3.35311	3	*
Ire1αi	DMSO	0.503333	0.101708	3	ns
	MAL3-101	1.53333	0.24037	3	ns	*
MDA MB 453
CTRL	DMSO	1	0	3	ns
	MAL3-101	3.34	0.871091	3	*
Ire1αi	DMSO	0.393333	0.0176383	3	ns
	MAL3-101	0.833333	0.163435	3	ns	**

## Sheet: Figure 8D
Figure 8D. Source data apoptotic marker and ISR marker protein level quantitations
Notes:	(1) Fold increase related to DMSO
	(2) Statistical significance in comparison to CTRL (GraphPad Prism software)
	ns: not significant
Cleaved Caspase 3	MDA MB 231				MDA MB 453
	Fold change(1)	SEM	N	Significance(2)	Fold change(1)	SEM	N	Significance(2)
CTRL	23.86	7.17632	4		1.2925	0.253718	4
Ire1i	19.1775	6.47348	4	ns	1.11333	0.069602	3	ns
Cleaved Caspase 8	MDA MB 231				MDA MB 453
	Fold change(1)	SEM	N	Significance(2)	Fold change(1)	SEM	N	Significance(2)
CTRL	15.515	4.11357	4		2.1125	0.459717	4
Ire1i	14.9825	4.55595	4	ns	1.12	0.130512	3	ns
CHOP	MDA MB 231				MDA MB 453
	Fold change(1)	SEM	N	Significance(2)	Fold change(1)	SEM	N	Significance(2)
CTRL	13.9975	5.72161	4		2.0825	0.657677	4
Ire1i	12.235	4.53424	4	ns	1.68	0.406263	4	ns
p-eIF2α	MDA MB 231				MDA MB 453
	Fold change(1)	SEM	N	Significance(2)	Fold change(1)	SEM	N	Significance(2)
CTRL	2.55667	0.246058	3		3.7225	1.02893	4
Ire1i	3.23667	0.951443	3	ns	2.7325	0.592683	4	ns
