# Supplementary material for: Unique integrated stress response sensors regulate cancer cell susceptibility when Hsp70 activity is compromised
Source: eLife. 2021 Jun 28;10:e64977. doi: 10.7554/eLife.64977 (PMC8275131; doi:10.7554/eLife.64977)
Supplement: Figure 9—source data 1. [file elife-64977-fig9-data1.xlsx]

## Sheet: Figure 9B
Figure 9B. Source data HRI level quantitations
Notes:	(1) Fold increase related to CTRL
	(2) Statistical significance in comparison to CTRL (GraphPad Prism software)
	**p≤0.005- ns: not significant
Cell line	Fold decrease(1)	SEM	N	Significance(2)
MDA MB 231	0.2	0.0608276	3	**
MDA MB 453	0.19	0.0916515	3	**

## Sheet: Figure 9C
Figure 9C. Source data apoptotic marker protein level quantitations
Notes:	(1) Fold increase related to DMSO
	(2) Statistical significance in comparison to CTRL (GraphPad Prism software)
	ns: not significant
Cleaved Caspase 3	MDA MB 231				MDA MB 453
	Fold change(1)	SEM	N	Significance(2)	Fold change(1)	SEM	N	Significance(2)
CTRL	29.9	6.66858	3		0.9	0.208167	3
HRIi	31.8667	5.7684	3	ns	2.1	0.680686	3	ns
Cleaved Caspase 8	MDA MB 231				MDA MB 453
	Fold change(1)	SEM	N	Significance(2)	Fold change(1)	SEM	N	Significance(2)
CTRL	13.8333	3.18346	3		1.23333	0.0666667	3
HRIi	22.3333	4.46368	3	ns	2.5	0.264575	3	ns
CHOP	MDA MB 231				MDA MB 453
	Fold change(1)	SEM	N	Significance(2)	Fold change(1)	SEM	N	Significance(2)
CTRL	17.2967	2.00848	3		1.1	0.152753	3
HRIi	22.51	2.16959	3	ns	1.76667	0.176383	3	ns
