# Supplementary material for: Unique integrated stress response sensors regulate cancer cell susceptibility when Hsp70 activity is compromised
Source: eLife. 2021 Jun 28;10:e64977. doi: 10.7554/eLife.64977 (PMC8275131; doi:10.7554/eLife.64977)
Supplement: Figure 10—figure supplement 1—source data 1. [file elife-64977-fig10-figsupp1-data1.xlsx]

## Sheet: Figure S6A
Figure S10A. Source data apoptotic marker protein level quantitations
Notes:	(1) Fold increase related to DMSO
	(2) Statistical significance in comparison to CTRL (GraphPad Prism software)
	*p≤0.05; **p≤0.005; ns: not significant
Cleaved Caspase 3	MDA MB 231				MDA MB 453
	Fold change(1)	SEM	N	Significance(2)	Fold change(1)	SEM	N	Significance(2)
CTRL	37.03	5.68624	4		1.18	0.140772	4
PERKi Oligo1	10.38	3.01689	4	*	0.88	0.146742	4	ns
PERKi Oligo2	7.84	2.44934	4	*	1.05	0.115253	4	ns
PKRi Oligo1	32.3875	12.0363	4	ns	1.005	0.186078	4	ns
PKRi Oligo2	37.3575	7.34612	4	ns	1.5975	0.495553	4	ns
Cleaved Caspase 8	MDA MB 231				MDA MB 453
	Fold change(1)	SEM	N	Significance(2)	Fold change(1)	SEM	N	Significance(2)
CTRL	24.4433	1.26652	3		1.29333	0.231541	3
PERKi Oligo1	12.9933	1.99668	3	**	0.79	0.164621	3	ns
PERKi Oligo2	11.6	1.73877	3	**	1.52667	0.418184	3	ns
PKRi Oligo1	24.55	2.73084	3	ns	1.49	0.522143	3	ns
PKRi Oligo2	23.4167	0.623387	3	ns	1.82	0.70713	3	ns
CHOP	MDA MB 231				MDA MB 453
	Fold change(1)	SEM	N	Significance(2)	Fold change(1)	SEM	N	Significance(2)
CTRL	19.9367	3.55758	3		2.83333	1.19591	3
PERKi Oligo1	4.37333	1.86842	3	**	1.97	0.312143	3	ns
PERKi Oligo2	5.39	0.834286	3	**	1.6	0.287112	3	ns
PKRi Oligo1	21.29	3.79324	3	ns	1.68333	0.349158	3	ns
PKRi Oligo2	21.68	2.29047	3	ns	1.77	0.13	3	ns

## Sheet: Figure S6B
Figure S10B. Source data PERK downstrean protein effector level quantitations
Notes:	(1) Fold increase related to DMSO
	(2) Statistical significance in comparison to CTRL (GraphPad Prism software)
	*p≤0.05; **p≤0.005; ns: not significant
CHOP	MDA MB 231				MDA MB 453
	Fold change(1)	SEM	N	Significance(2)	Fold change(1)	SEM	N	Significance(2)
CTRL	4.44	0.95687	3		3.25	0.25	2
PERKi	0.88	0.292803	3	*	1.24977	0.149765	2	*
p-eIF2α	MDA MB 231				MDA MB 453
	Fold change(1)	SEM	N	Significance(2)	Fold change(1)	SEM	N	Significance(2)
CTRL	1.81667	0.144029	3		1.81	0.0953939	3
PERKi	0.9	0.057735	3	**	1.06667	0.0881917	3	**

## Sheet: Figure S6C
Figure S10C. Source data p-eIF2α protein level quantitations
Notes:	(1) Fold increase related to DMSO
	(2) Statistical significance in comparison to CTRL (GraphPad Prism software)
	*p≤0.05; ns: not significant
p-eIF2α	MDA MB 231				MDA MB 453
	Fold change(1)	SEM	N	Significance(2)	Fold change(1)	SEM	N	Significance(2)
CTRL	3.74	0.748788	4		6.6275	1.32182	4
PERKi Oligo1	1.88672	0.254538	4	*	3.395	1.01052	4	ns
PERKi Oligo2	1.95945	0.284261	4	*	3.6775	1.08893	4	ns
PKRi Oligo1	2.37195	0.391951	4	*	3.15667	1.14464	3	ns
PKRi Oligo2	2.02743	0.289403	4	*	2.635	0.658818	4	ns

## Sheet: Figure S6D
Figure S10D. Source data apoptotic marker protein level quantitations
Notes:	(1) Fold increase related to DMSO
	(2) Statistical significance in comparison to CTRL (GraphPad Prism software)
	*p≤0.05; ns: not significant
Cleaved Caspase 3	MDA MB 231				MDA MB 453
	Fold change(1)	SEM	N	Significance(2)	Fold change(1)	SEM	N	Significance(2)
MAL3-101	20.9333	0.959745	3		1.43333	0.0881917	3
MAL3-101 + GSK	5.06667	1.73333	3	*	1.5	0.208167	3	ns
Cleaved Caspase 8	MDA MB 231				MDA MB 453
	Fold change(1)	SEM	N	Significance(2)	Fold change(1)	SEM	N	Significance(2)
MAL3-101	13.9333	2.44427	3		1	0	3
MAL3-101 + GSK	3.2	1.17189	3	*	0.9	0.173205	3	ns
CHOP	MDA MB 231				MDA MB 453
	Fold change(1)	SEM	N	Significance(2)	Fold change(1)	SEM	N	Significance(2)
MAL3-101	11.2	1.40475	3		1.23333	0.333333	3
MAL3-101 + GSK	2.66667	0.705534	3	*	0.866667	0.0666667	3	ns
