# Supplementary material for: Unique integrated stress response sensors regulate cancer cell susceptibility when Hsp70 activity is compromised
Source: eLife. 2021 Jun 28;10:e64977. doi: 10.7554/eLife.64977 (PMC8275131; doi:10.7554/eLife.64977)
Supplement: Figure 10—source data 1. [file elife-64977-fig10-data1.xlsx]

## Sheet: Figure 10B 
Figure10B. Source data PERK and PKR protein level quantitations
Notes:	(1) Fold decrease related to CTRL
	(2) Statistical significance in comparison to CTRL (GraphPad Prism software)
	***p≤0.0005; ****p≤0.0001
		MDA MB 231				MDA MB 453
		Fold decrease(1)	SEM	N	Significance(2)	Fold decrease(1)	SEM	N	Significance(2)
PERK	Oligo1	0.095	0.0352373	4	****	0.2175	0.0626332	4	***
	Oligo2	0.03	0.0135401	4	****	0.2025	0.0698063	4	***
PKR	Oligo1	0.0333333	0.0333333	3	****	0.0533333	0.0202759	3	****
	Oligo2	0.03	0.0152753	3	****	0.106667	0.0120185	3	****
