# Supplementary material for: Unique integrated stress response sensors regulate cancer cell susceptibility when Hsp70 activity is compromised
Source: eLife. 2021 Jun 28;10:e64977. doi: 10.7554/eLife.64977 (PMC8275131; doi:10.7554/eLife.64977)
Supplement: Figure 11—figure supplement 1—source data 1. [file elife-64977-fig11-figsupp1-data1.xlsx]

## Sheet: Figure S7B
Figure S11B. Source data p-eIF2α protein level quantitations
Notes:	(1) Fold increase related to DMSO
	(2) Statistical significance in comparison to CTRL (GraphPad Prism software)
	ns: not significant
p-eIF2α	MDA MB 231				MDA MB 453
	Fold change(1)	SEM	N	Significance(2)	Fold change(1)	SEM	N	Significance(2)
MAL3-101	2.0825	0.420285	4		3.1	0.147196	4
MAL3-101 + ISRIB	2.255	0.433618	4	ns	4.225	0.597739	4	ns

## Sheet: Figure S7D
Figure S10D. Source data apoptotic marker protein level quantitations
Notes:	(1) Fold increase related to DMSO
	(2) Statistical significance in comparison to CTRL (GraphPad Prism software)
	*p≤0.05; ***p≤0.0005; ns: not significant
Cleaved Caspase 3	MDA MB 231				MDA MB 453
	Fold change(1)	SEM	N	Significance(2)	Fold change(1)	SEM	N	Significance(2)
MAL3-101	17.3333	3.27685	3		1.16667	0.202759	3
MAL3-101 + ISRIB	5.83333	0.328295	3	*	3.7	0.737111	3	ns
Cleaved Caspase 8	MDA MB 231				MDA MB 453
	Fold change(1)	SEM	N	Significance(2)	Fold change(1)	SEM	N	Significance(2)
MAL3-101	16.6333	2.69712	3		0.833333	0.0881917	3
MAL3-101 + ISRIB	3.69333	0.584846	3	*	3.64667	0.581531	3	*
CHOP	MDA MB 231				MDA MB 453
	Fold change(1)	SEM	N	Significance(2)	Fold change(1)	SEM	N	Significance(2)
MAL3-101	17.1725	1.3498	4		0.9325	0.114991	4
MAL3-101 + ISRIB	5.95	0.564594	4	***	1.9	0.58023	4	ns
