# Supplementary material for: Unique integrated stress response sensors regulate cancer cell susceptibility when Hsp70 activity is compromised
Source: eLife. 2021 Jun 28;10:e64977. doi: 10.7554/eLife.64977 (PMC8275131; doi:10.7554/eLife.64977)
Supplement: Figure 11—source data 1. [file elife-64977-fig11-data1.xlsx]

## Sheet: Figure 11B
Figure 11B. Source data GCN2 level quantitations
Notes:	(1) Fold decrease related to CTRL
	(2) Statistical significance in comparison to CTRL (GraphPad Prism software)
	***p≤0.0005; ****p≤0.0001
	Fold decrease(1)	SEM	N	Significance(2)	Fold decrease(1)	SEM	N	Significance(2)
Oligo1	0.11	0.0493288	3	****	0.13	0.0470815	4	****
Oligo2	0.09	0.0208167	3	****	0.1175	0.0566238	4	****

## Sheet: Figure 11C
Figure 11C. Source data apoptotic marker and ISR marker protein level quantitations
Notes:	(1) Fold increase related to DMSO
	(2) Statistical significance in comparison to CTRL (GraphPad Prism software)
	* p≤0.05; **p≤0.005; ***p≤0.0005; ****p≤0.0001 - ns: not significant
Cleaved Caspase 3	MDA MB 231				MDA MB 453
	Fold change(1)	SEM	N	Significance(2)	Fold change(1)	SEM	N	Significance(2)
CTRL	27.2825	1.58933	4		1.5675	0.337352	4
Oligo1	17.5575	4.03891	4	ns	14.1275	5.44164	4	*
Oligo2	21.1425	5.1476	4	ns	12.55	1.65291	4	*
Cleaved Caspase 8	MDA MB 231				MDA MB 453
	Fold change(1)	SEM	N	Significance(2)	Fold change(1)	SEM	N	Significance(2)
CTRL	36.2	9.7166	3		2.87667	0.398218	3
Oligo1	44.3633	16.9552	3	ns	40.0933	3.6152	3	***
Oligo2	42.62	9.42077	3	ns	67.1067	3.64072	3	****
CHOP	MDA MB 231				MDA MB 453
	Fold change(1)	SEM	N	Significance(2)	Fold change(1)	SEM	N	Significance(2)
CTRL	12.55	4.48952	3		2.70667	0.314183	3
Oligo1	12.8233	5.84287	3	ns	13.4433	2.674	3	*
Oligo2	12.85	5.9381	3	ns	14.6433	3.91064	3	*
p-eIF2α	MDA MB 231				MDA MB 453
	Fold change(1)	SEM	N	Significance(2)	Fold change(1)	SEM	N	Significance(2)
CTRL	2.945	0.552336	4		3.5675	0.625518	4
Oligo1	2.085	0.438682	4	ns	1.665	0.175143	4	*
Oligo2	1.9175	0.460115	4	ns	1.78	0.0807259	4	*
