# Supplementary material for: Unique integrated stress response sensors regulate cancer cell susceptibility when Hsp70 activity is compromised
Source: eLife. 2021 Jun 28;10:e64977. doi: 10.7554/eLife.64977 (PMC8275131; doi:10.7554/eLife.64977)
Supplement: Figure 12—figure supplement 1—source data 1. [file elife-64977-fig12-figsupp1-data1.xlsx]

## Sheet: Figure S8A
Figure S12A. Source data LC3BII and LC3BII/I quantitations in MDA MB 231 cells
Note:	(1) Fold chage (CQ treated/ CQ untreated)
		LC3BII						LC3BII/I
		Fold change(1)	SEM	N				Fold change(1)	SEM	N
CTRL	CQ	2.028	0.247538	10		CTRL	CQ	1.46611	0.10557	11
	MAL3-101	1.2655	0.110711	10			MAL3-101	1.34008	0.132195	11
PERKi	CQ	2.58667	0.597365	3		PERKi	CQ	1.63333	0.233333	3
	MAL3-101	1.00667	0.17901	3			MAL3-101	2.08333	0.15899	3
GCN2i	CQ	2.07333	0.893501	3		GCN2i	CQ	2.4125	0.666275	4
	MAL3-101	0.993333	0.0783865	3			MAL3-101	2.185	0.577935	4
PERKi + GCN2i	CQ	2.11525	0.182046	4		PERKi + GCN2i	CQ	1.20217	0.177784	4
	MAL3-101	1.29775	0.270136	4			MAL3-101	1.05025	0.336861	4

## Sheet: Figure S8B
Figure S12B. Source data LC3BII and LC3BII/I quantitations in MDA MB 453 cells
Note:	(1) Fold chage (CQ treated/ CQ untreated)
	(2) Statistical significance in comparison to CQ CTRL sample (GraphPad Prism software)
	(3) Statistical significance in comparison to MAL3-101 CTRL sample (GraphPad Prism software)
	(4) Statistical significance between CQ and MAL3-101 samples (GraphPad Prism software)
	* p≤0.05; **p≤0.005; ***p≤0.0005; ****p≤0.0001 - ns: not significant
		LC3BII										LC3BII/I
		Fold change(1)	SEM	N	Significance(2)	Significance(3)	Significance(4)					Fold change(1)	SEM	N	Significance(2)	Significance(3)	Significance(4)
CTRL	CQ	3.342	0.287421	12						CTRL	CQ	3.41988	0.24936	11
	MAL3-101	5.68	0.394644	12			***				MAL3-101	5.25493	0.398292	11			**
PERKi	CQ	1.39667	0.1761	3	*					PERKi	CQ	2.23333	0.0927961	3	*
	MAL3-101	3.35333	0.60361	3		ns	*				MAL3-101	4.03333	0.506173	3		ns	*
GCN2i	CQ	2.8825	0.310681	4	ns					GCN2i	CQ	3.10407	0.639198	4	ns
	MAL3-101	1.5525	0.464011	4		*	ns				MAL3-101	1.56856	0.275119	4		*	ns
PERKi + GCN2i	CQ	0.905	0.10975	6	**					PERKi + GCN2i	CQ	1.442	0.365587	5	**
	MAL3-101	0.893333	0.0449197	6		****	ns				MAL3-101	1.132	0.196199	5		***	ns
