# Supplementary figures and images for: Unique integrated stress response sensors regulate cancer cell susceptibility when Hsp70 activity is compromised
Source: eLife journal article supplement (doi:10.7554/elife.64977), 2021-06-28

**A**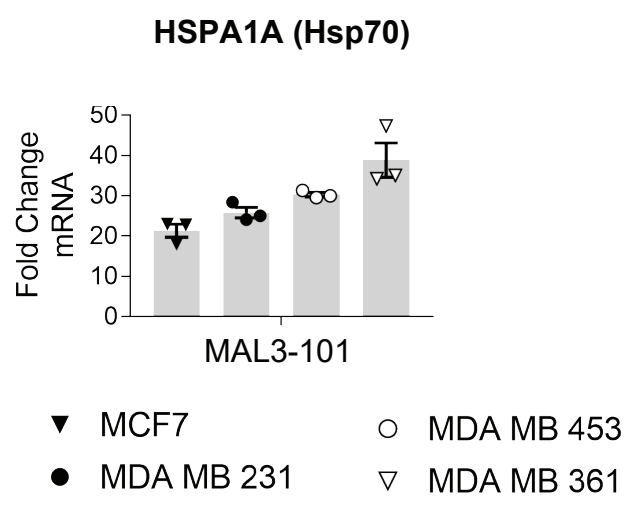**B**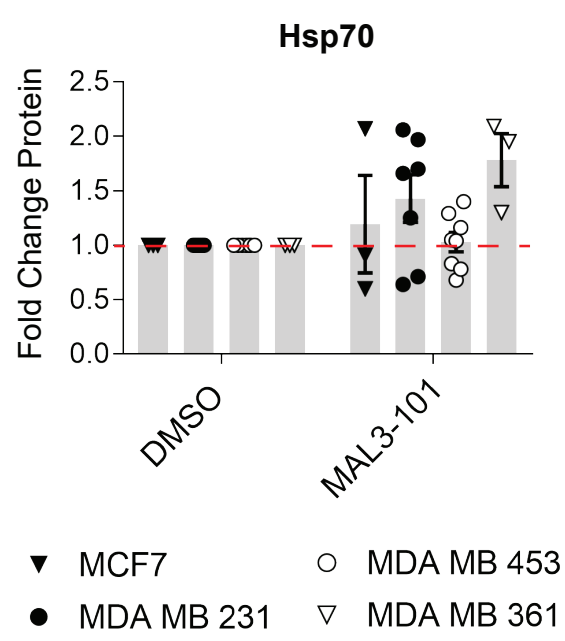**C**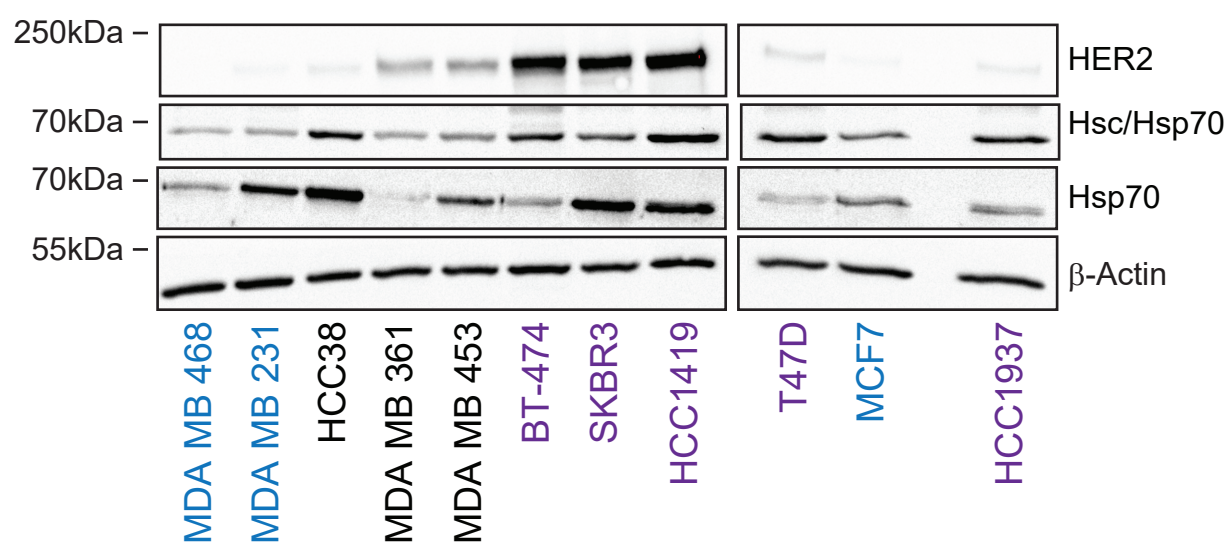

Figure Supplement 1

Supplement: supp [file elife-64977-supp-v1.zip]

**A**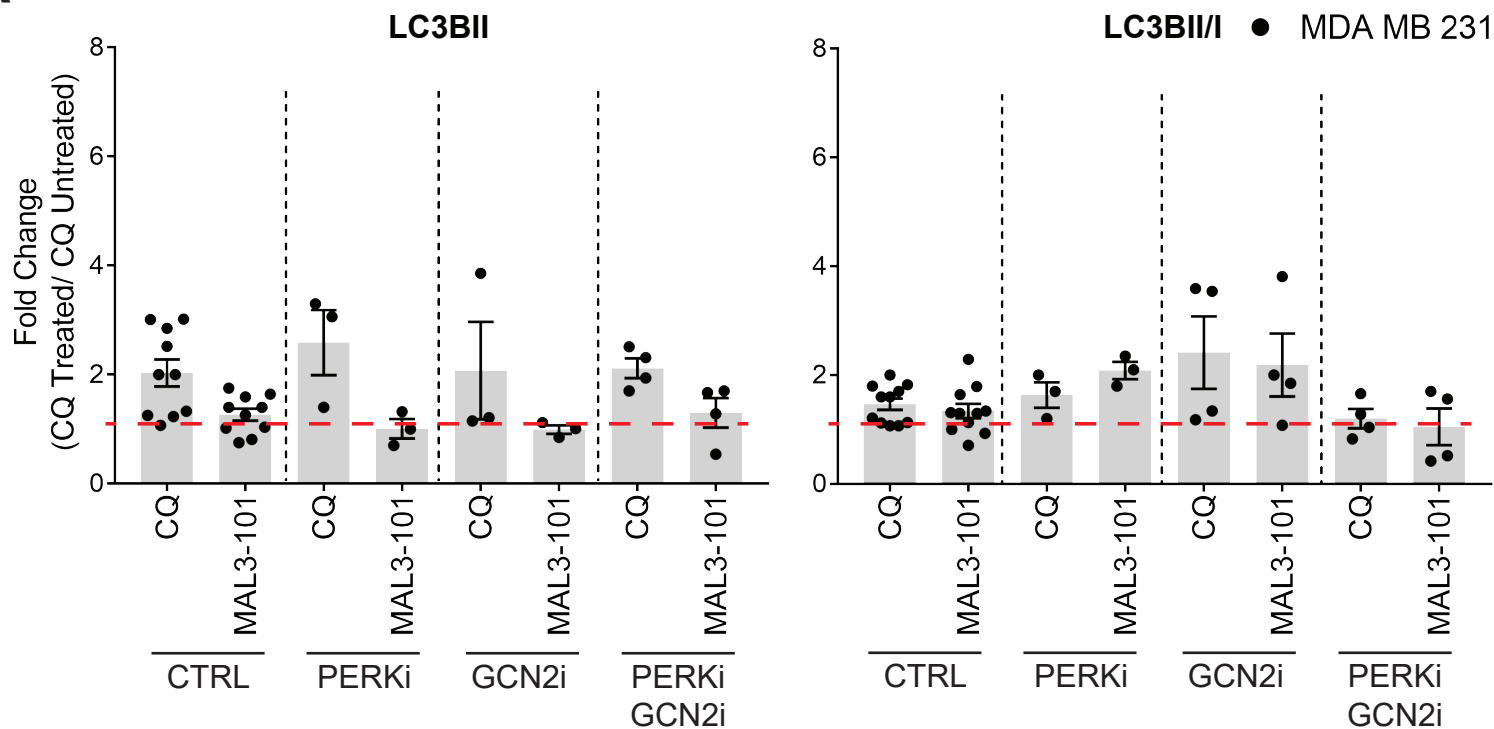**B**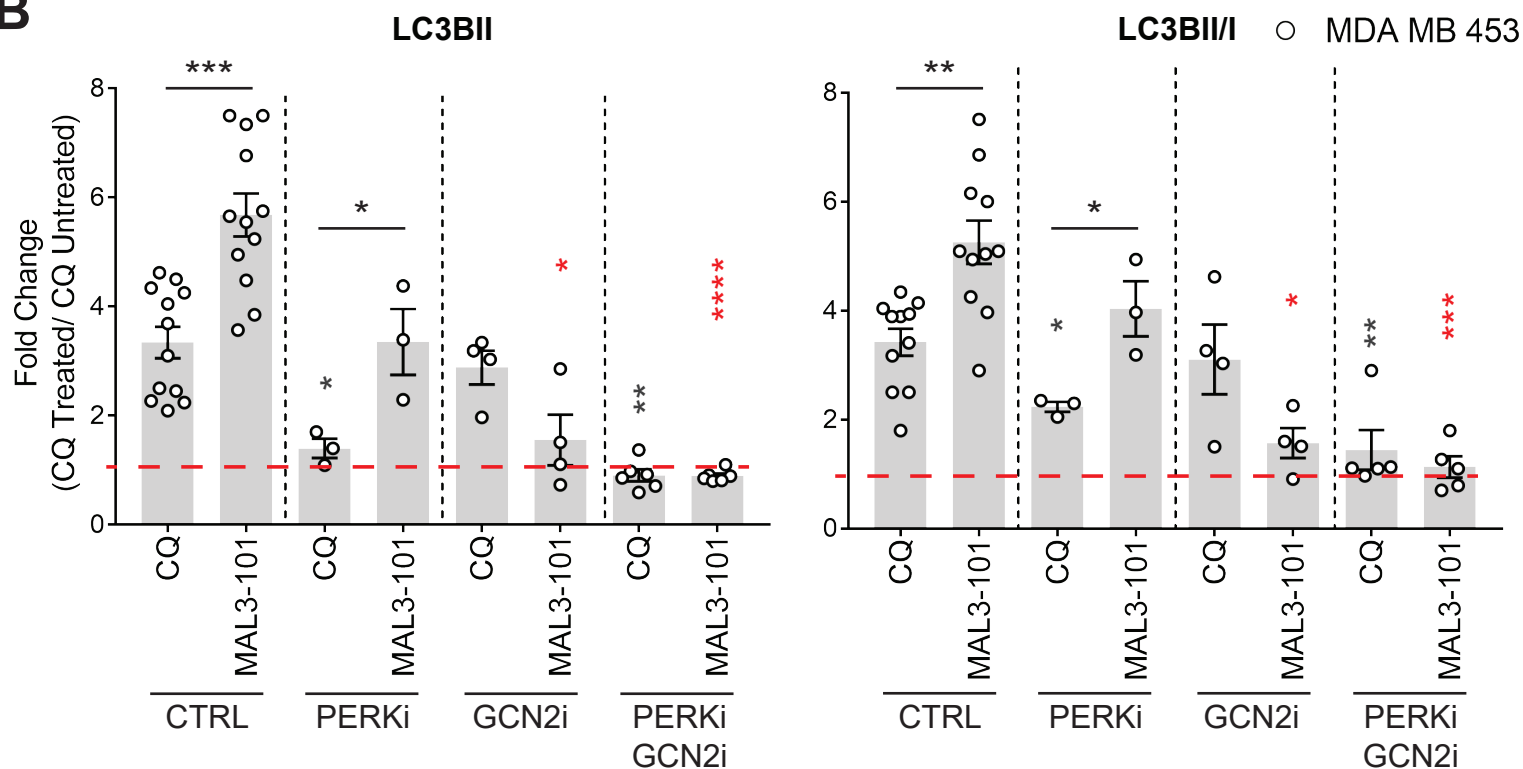

Figure Supplement 8

Supplement: supp [file elife-64977-supp-v1.zip]

**A**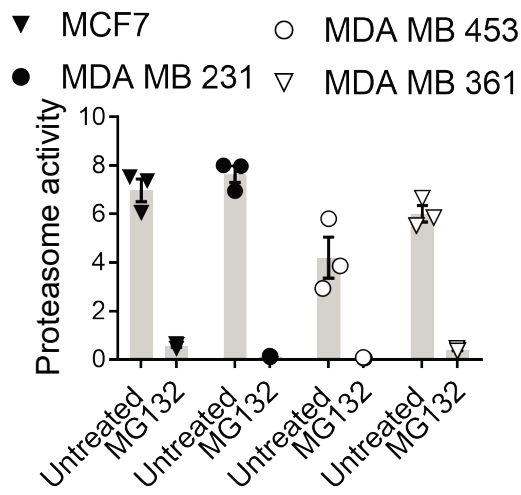**B**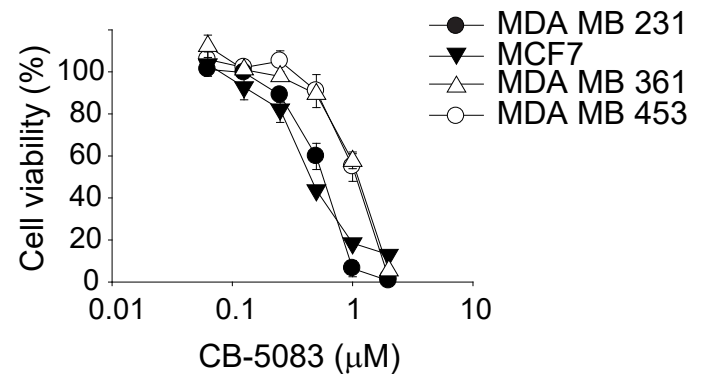**C**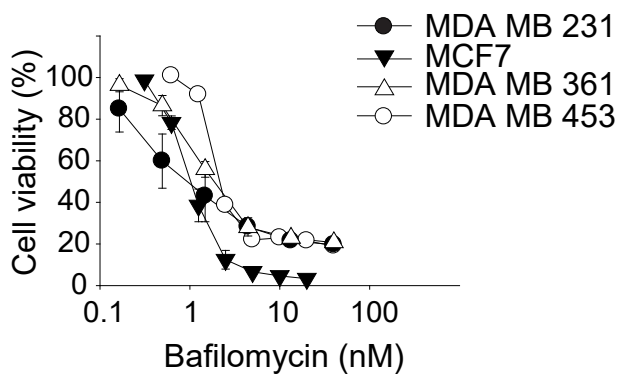**D**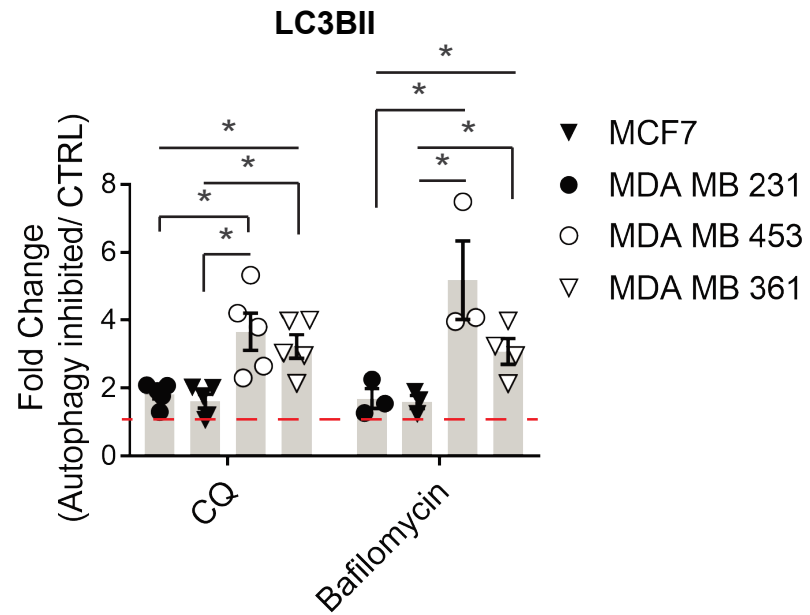**E**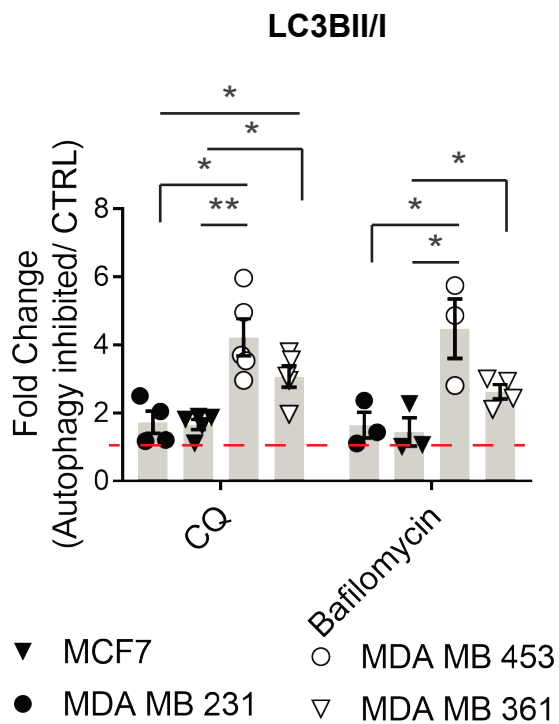**F**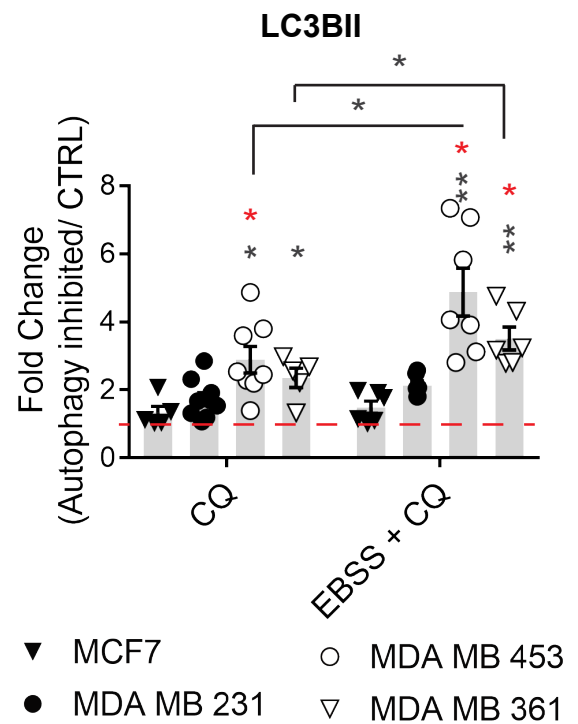

Figure Supplement 2

Supplement: supp [file elife-64977-supp-v1.zip]

**A**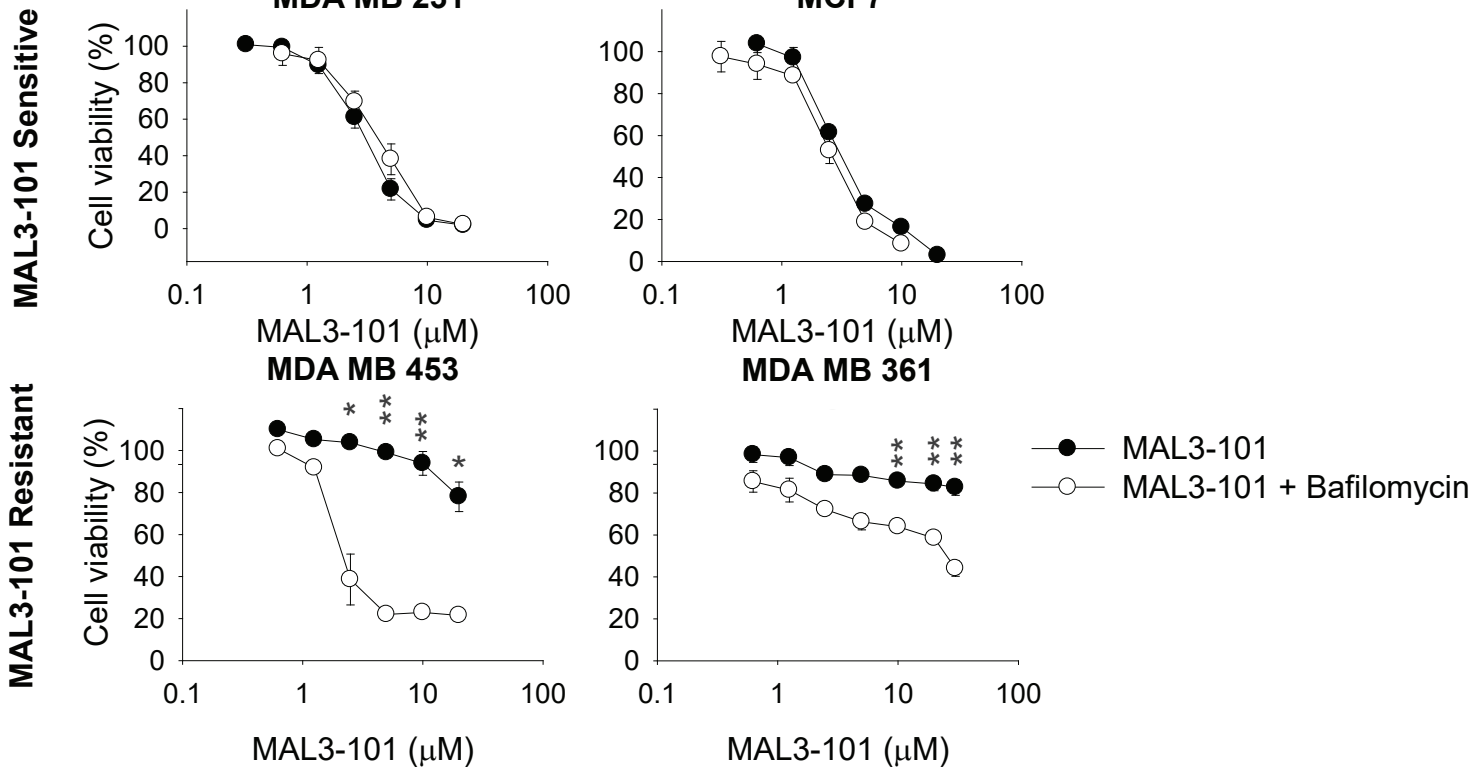**B**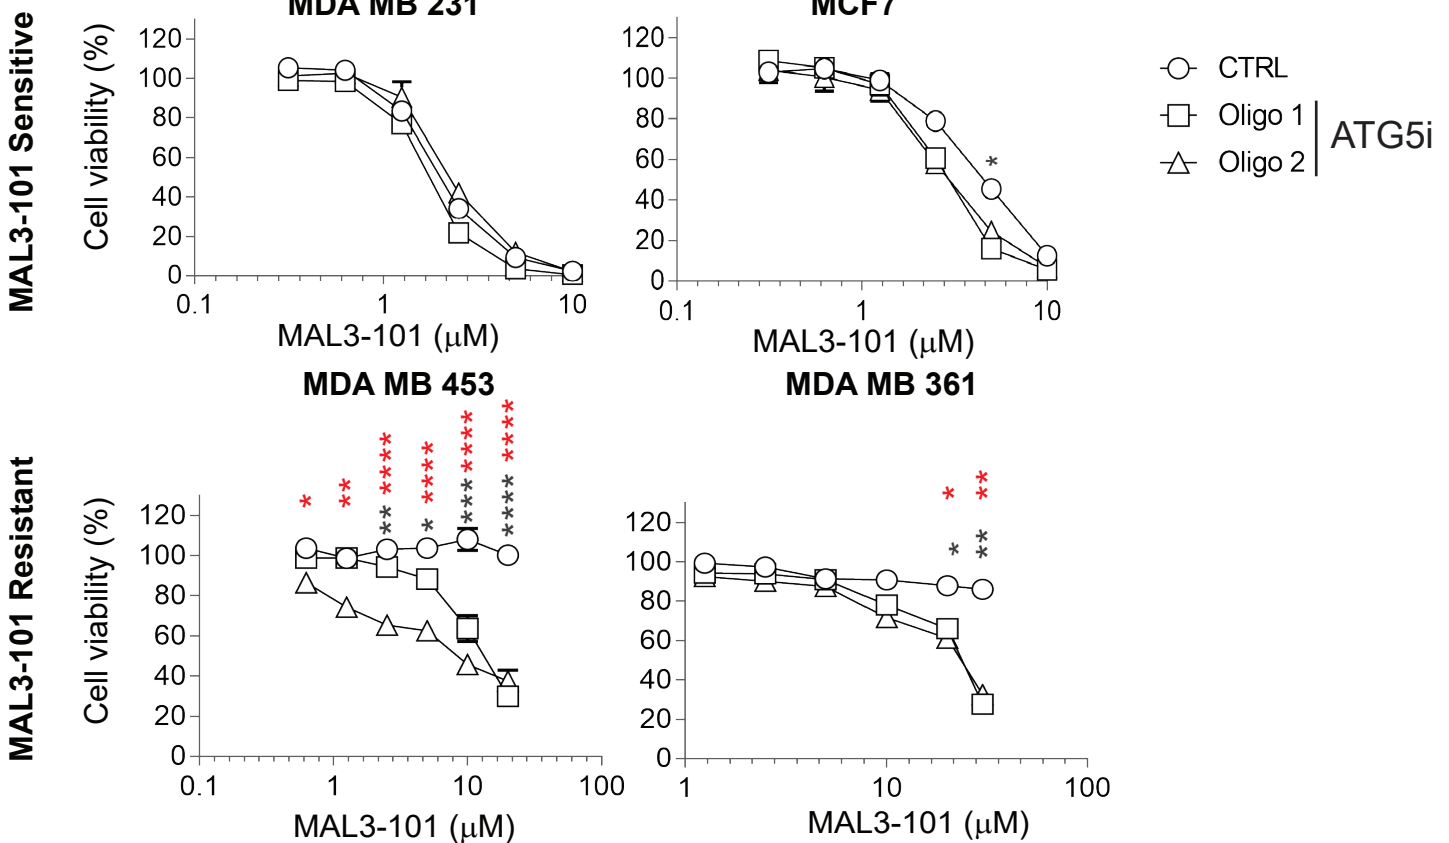**C**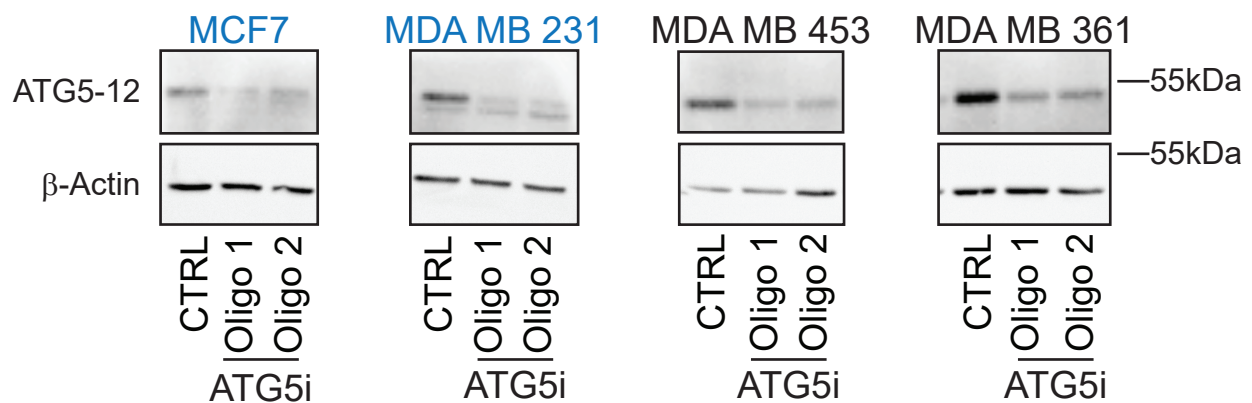

Figure Supplement 3

Supplement: supp [file elife-64977-supp-v1.zip]

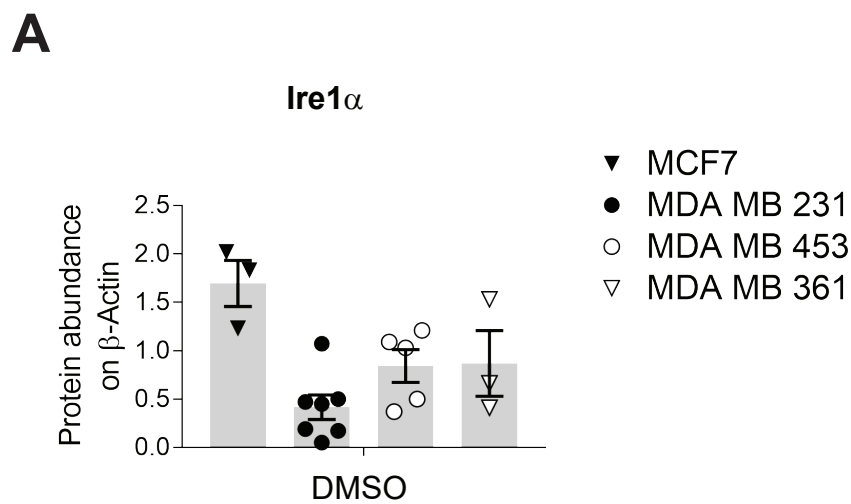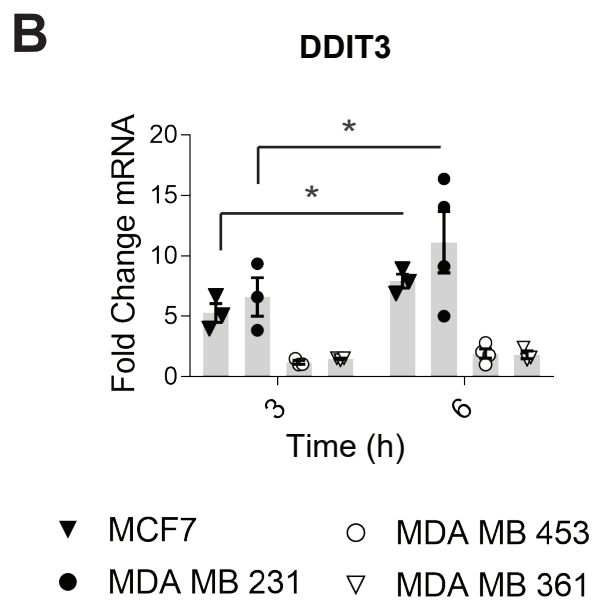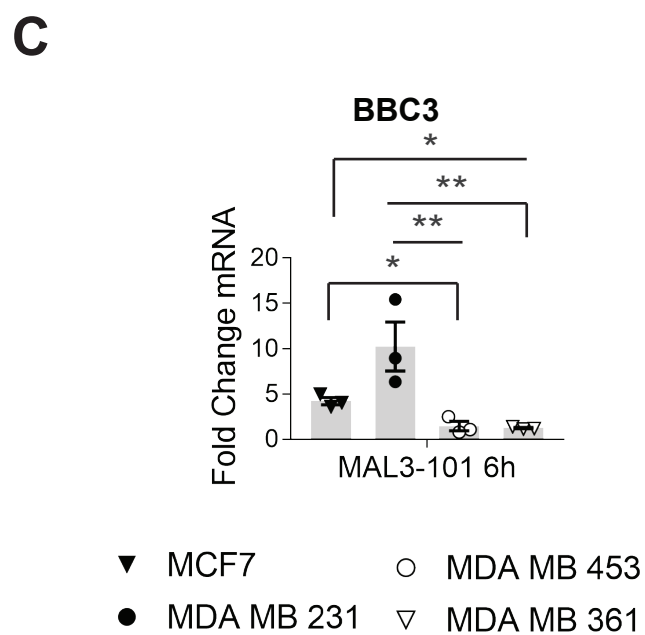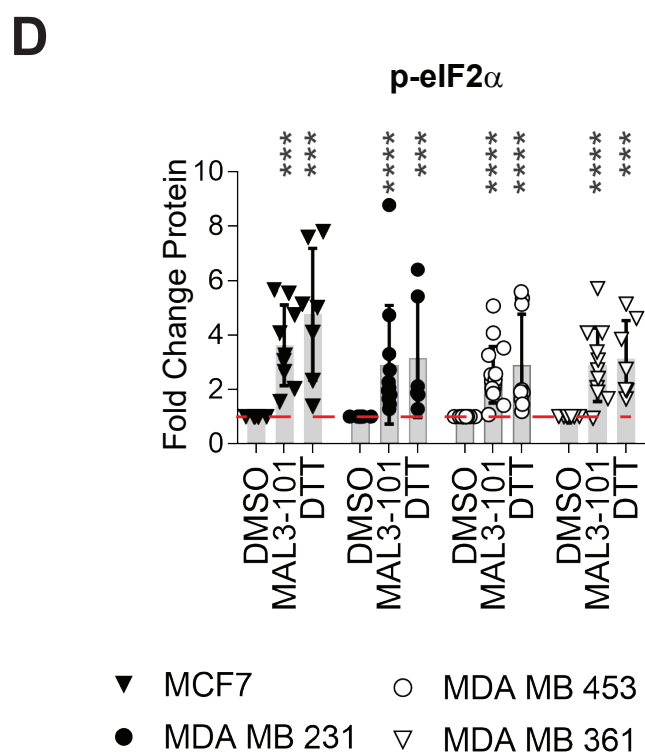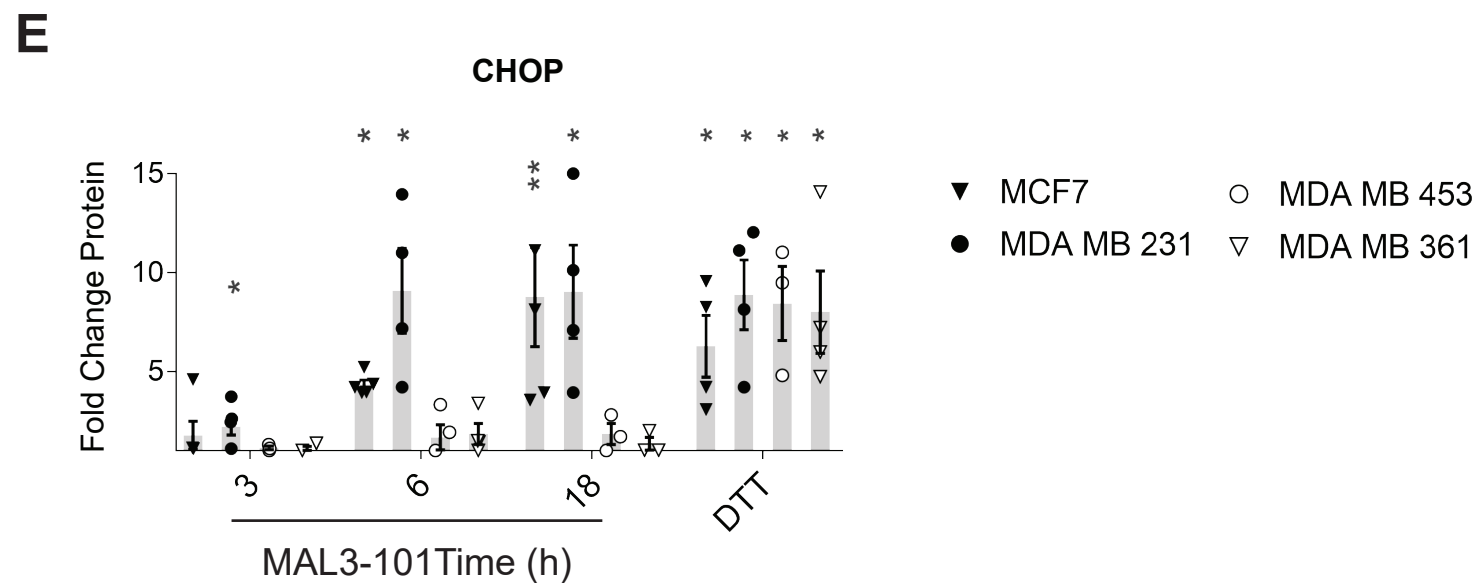

Figure Supplement 5

Supplement: supp [file elife-64977-supp-v1.zip]

**A**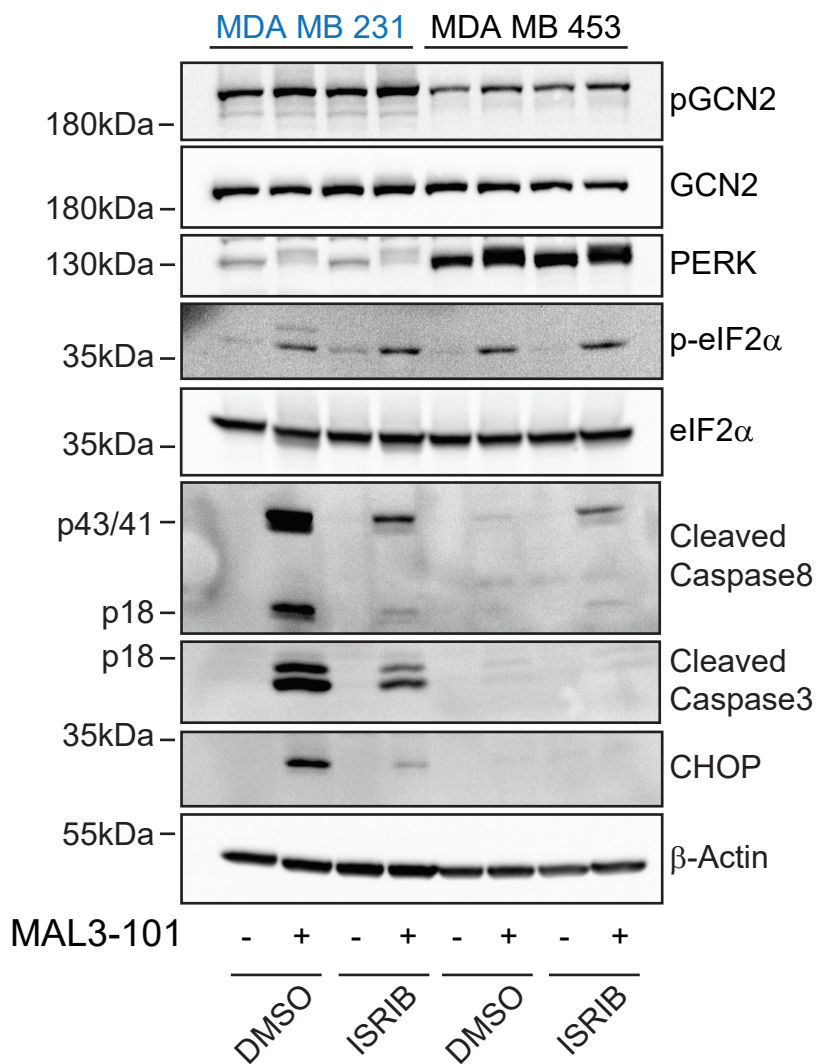**B**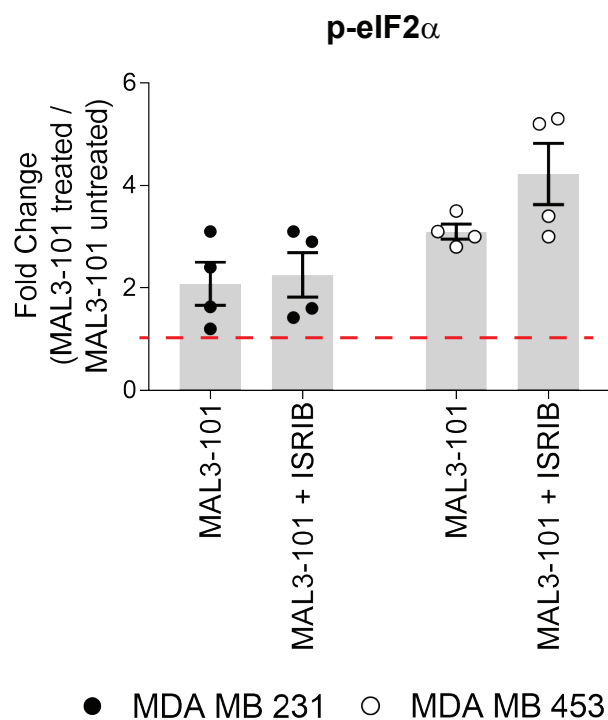**C**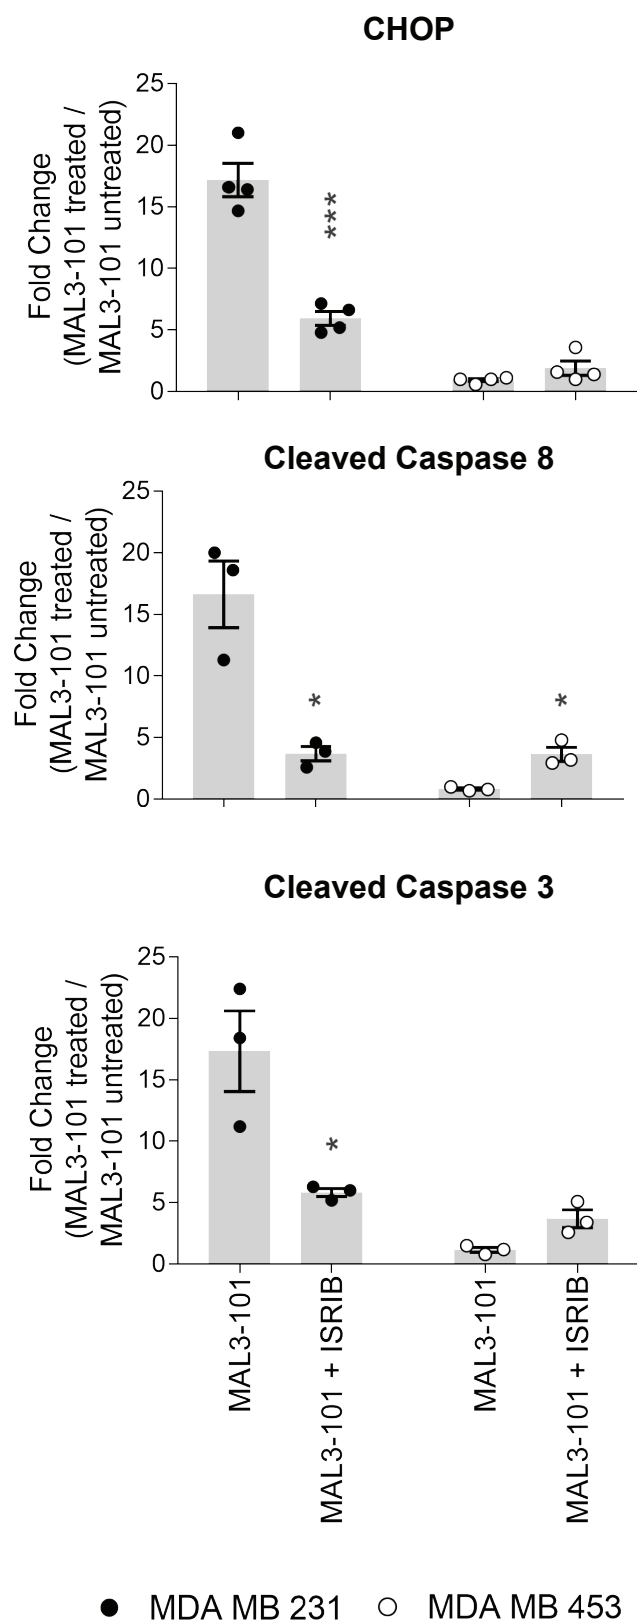

Figure Supplement 7

Supplement: supp [file elife-64977-supp-v1.zip]

B

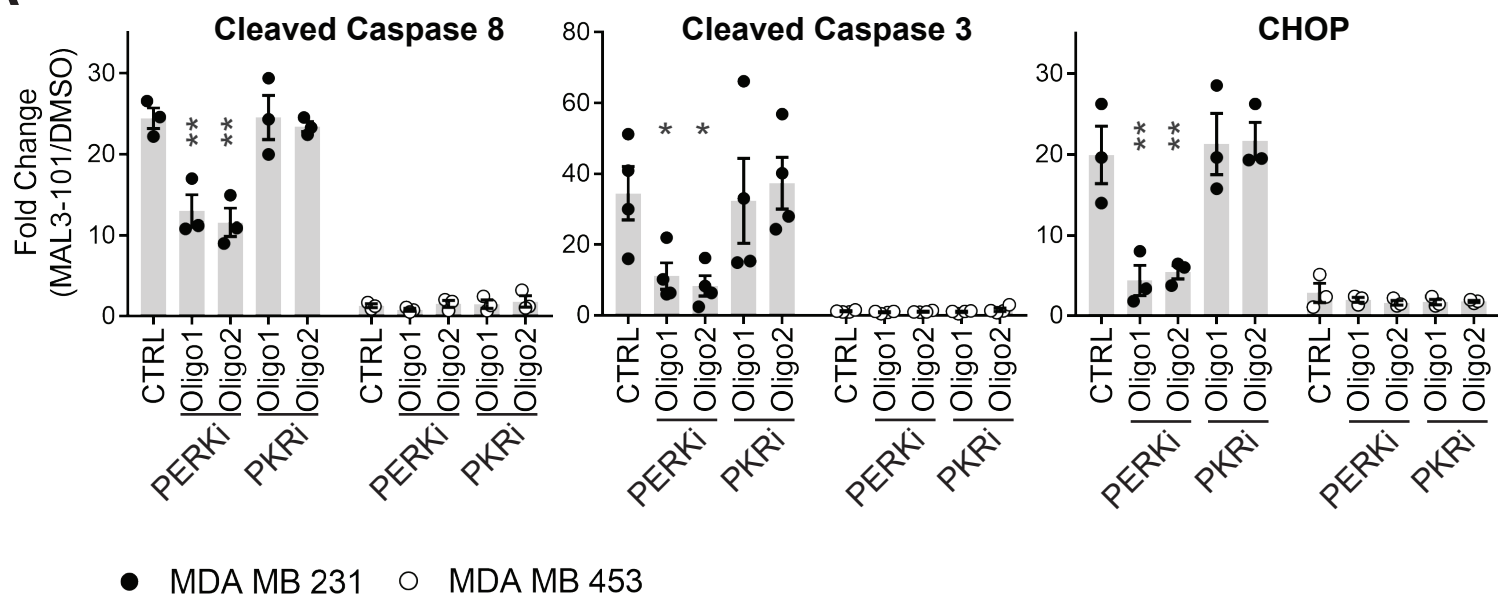

# B

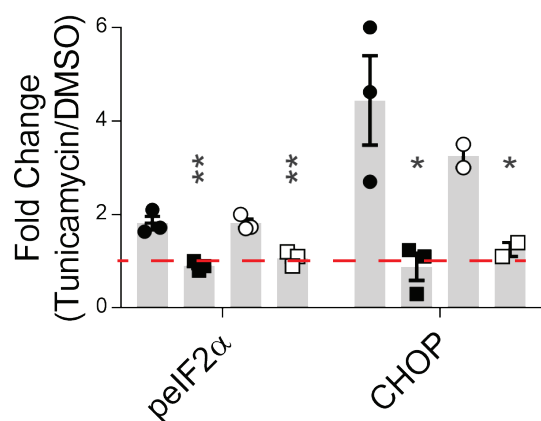

- CTRLi MDA MB 231    ○ CTRLi MDA MB 453
- PERKi MDA MB 231    □ PERKi DA MB 453

C

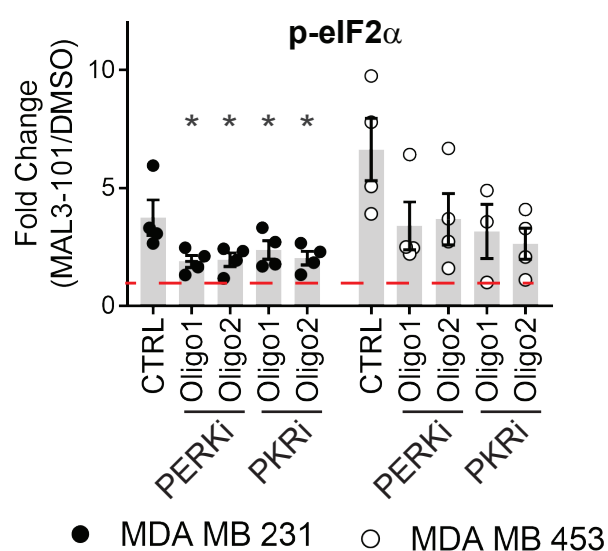

D

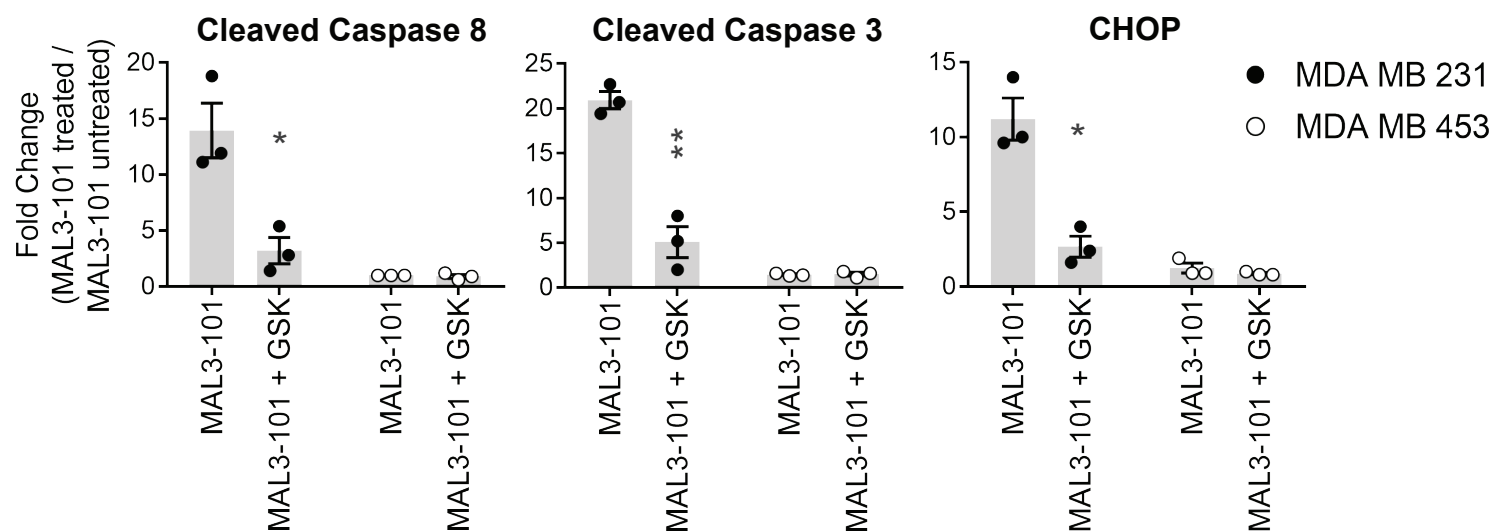

## Figure Supplement 6

Supplement: supp [file elife-64977-supp-v1.zip]

**A**

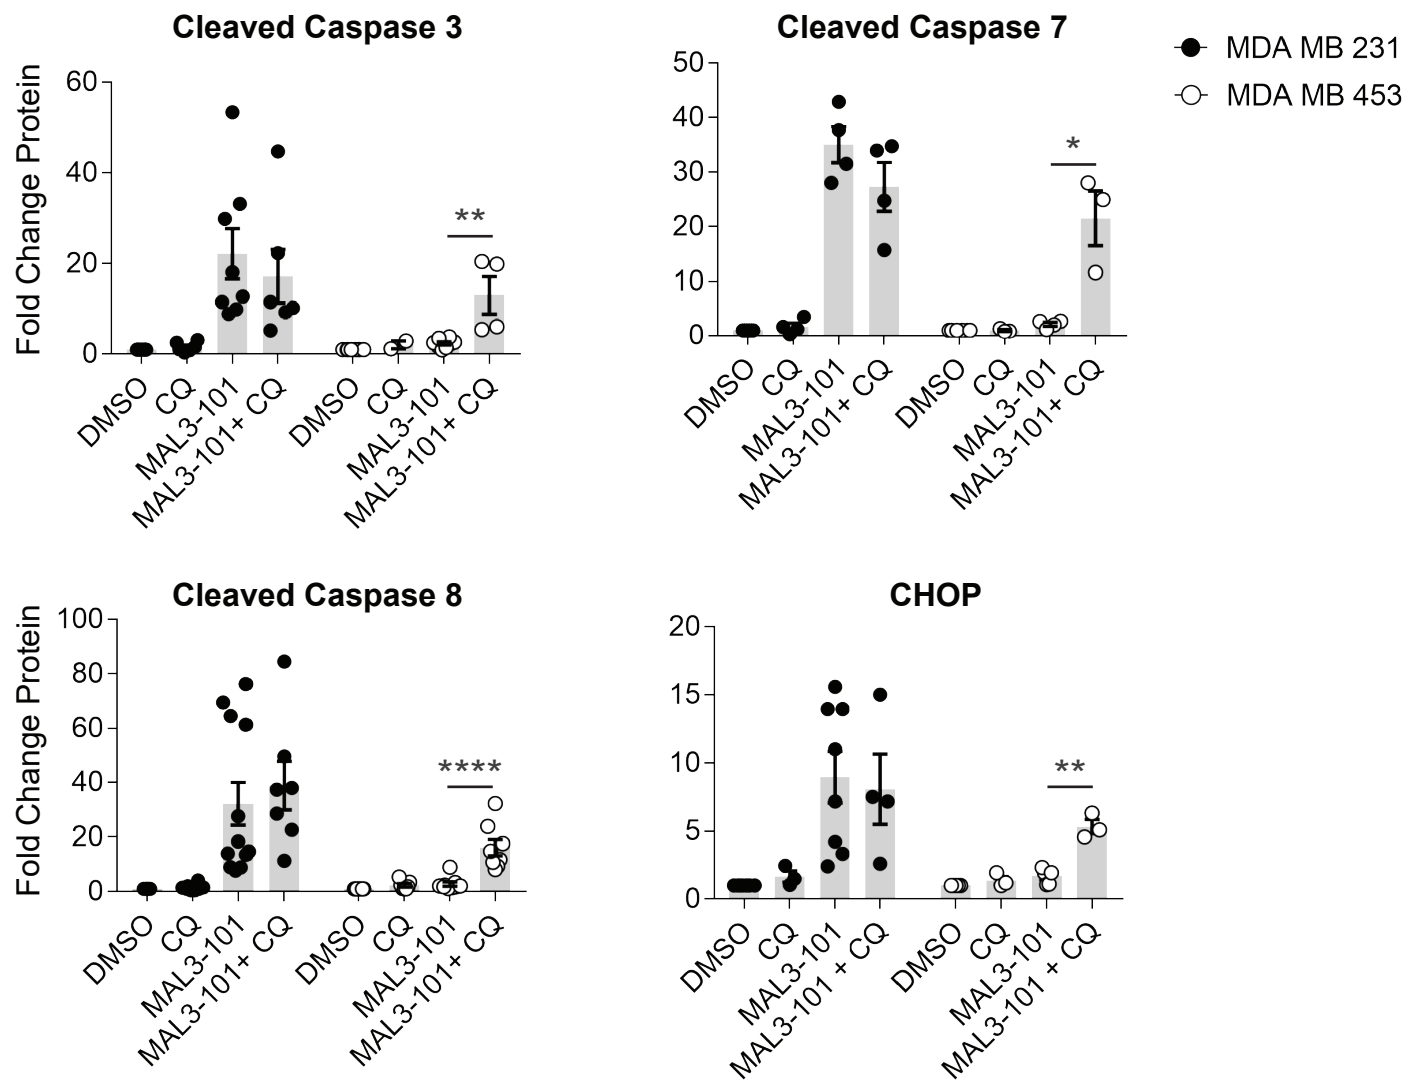

Figure Supplement 4

Supplement: supp [file elife-64977-supp-v1.zip]
